# Supplementary material
Source: PubMed Central journal article supplement (PMC3631471)
Supplement: NIHMS454465-supplement-1_si_001.pdf [file NIHMS454465-supplement-1_si_001.pdf]

## Supporting Information

### **Enhanced Reactivity in Dioxirane C-H Oxidations via Strain Release: A Computational and Experimental Study**

Lufeng Zou,<sup>1</sup> Robert S. Paton\*,<sup>1,2</sup> Albert Eschenmoser,<sup>3</sup> Timothy R. Newhouse,<sup>4</sup> Phil S. Baran,<sup>4</sup>  
and K. N. Houk\*,<sup>1</sup>

<sup>1</sup> *Department of Chemistry and Biochemistry, University of California, Los Angeles, California 90095*

<sup>2</sup> *Chemistry Research Laboratory, Mansfield Road, Oxford, OX1 3TA U.K.*

<sup>3</sup> *Laboratorium für Organische Chemie, ETH Zürich, Wolfgang-Pauli-Strasse 10, CH-8093, Switzerland*

<sup>4</sup> *Department of Chemistry, The Scripps Research Institute, La Jolla, California 92037*

\* [houk@chem.ucla.edu](mailto:houk@chem.ucla.edu), [robert.paton@chem.ox.ac.uk](mailto:robert.paton@chem.ox.ac.uk)

## Contents:

|                                                                                                                                                                   |            |
|-------------------------------------------------------------------------------------------------------------------------------------------------------------------|------------|
| <b>Figure S1.</b> Breakdown of distortion/interaction energies along the internal reaction coordinates (IRC) for the reactions of DMDO with 1-methylcyclohexanes. | <b>S3</b>  |
| <b>Figure S2.</b> Breakdown of distortion/interaction energies along the internal reaction coordinates (IRC) for the reactions of DMDO with cyclohexanes.         | <b>S4</b>  |
| <b>Figure S3.</b> Transition state geometries for TFDO and isobutane reaction.                                                                                    | <b>S5</b>  |
| <b>Table S1.</b> CASPT2 natural orbital occupancies (NOOs) of frontier orbitals, and activation energies in the rate-determining transition states.               | <b>S5</b>  |
| <b>Figure S4.</b> Reaction pathway in TFDO oxidations. Energy in kcal/mol. UB3LYP/6-311++G(d,p)//UB3LYP/6-31G(d).                                                 | <b>S6</b>  |
| <b>Cartesian Coordinates for Dioxiranes and Alkanes.</b>                                                                                                          | <b>S7</b>  |
| <b>Cartesian Coordinates for Transition states.</b>                                                                                                               | <b>S17</b> |
| <b>Full Reference of 32</b>                                                                                                                                       | <b>S52</b> |

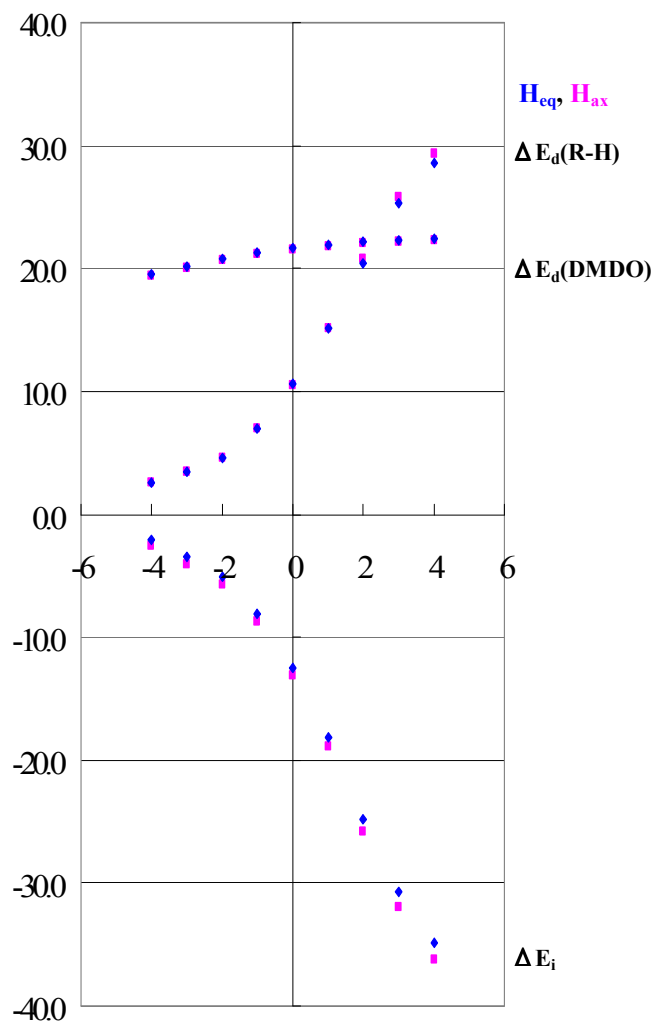

**Figure S1.** Breakdown of distortion/interaction energies along the internal reaction coordinates (IRC) for the reactions of DMDO with 1-methylcyclohexanes. The C-H bonds are functionalized at the equatorial position (for 1-axial-1-methyl-cyclohexane) or axial position (for 1-equatorial-1-methyl-cyclohexane). Energies in kcal/mol with respect to their corresponding reactants. The x axis is the “internal reaction coordinate” from calculation, and the origin is the transition state.

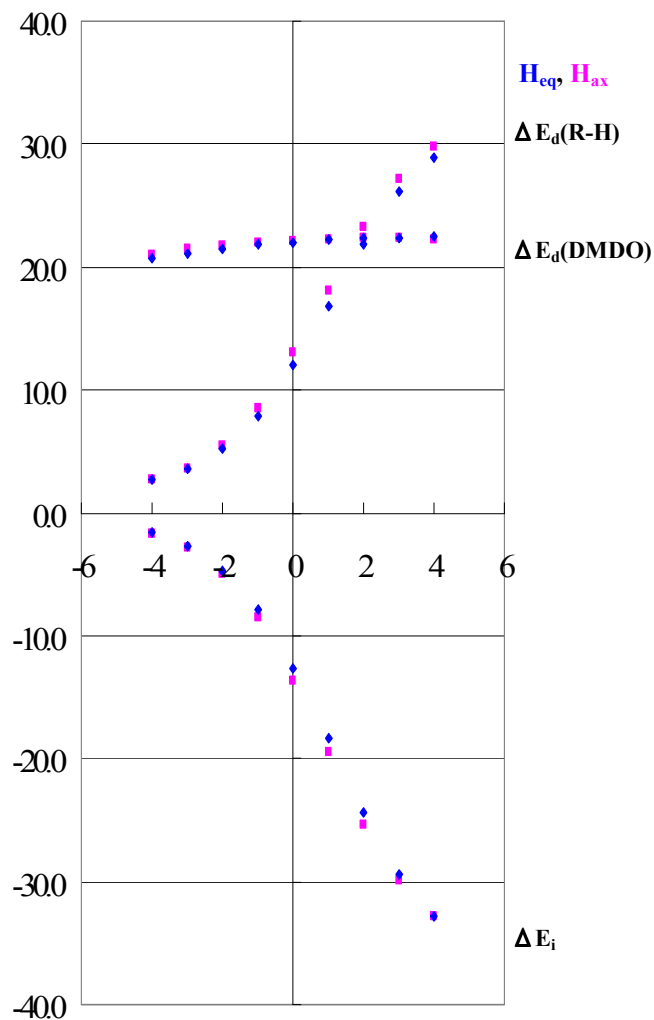

**Figure S2.** Breakdown of distortion/interaction energies along the internal reaction coordinates (IRC) for the reactions of DMDO with cyclohexanes. The C-H bonds are functionalized at the equatorial or axial positions. Energies in kcal/mol with respect to their corresponding reactants. The x axis is the “internal reaction coordinate” from calculation, and the origin is the transition state.

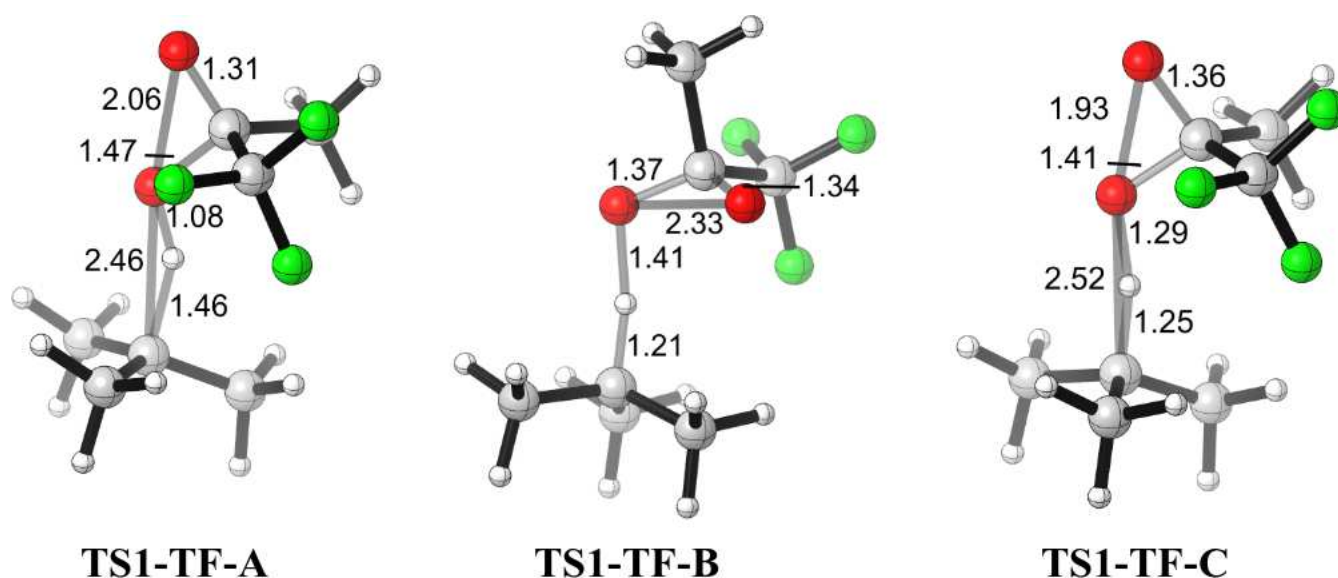

**Figure S3.** Transition state geometries for TFDO and isobutane reaction.

**Table S1.** Natural orbital occupancies (NOOs) of frontier orbitals, and activation energies in the rate-determining transition states<sup>a</sup>

|          | HOMO | LUMO | CASPT2/cc-pVDZ | CASPT2/6-31G(d) | UB3LYP <sup>b</sup> |
|----------|------|------|----------------|-----------------|---------------------|
| TS1-A    | 1.42 | 0.58 | 21.0           | 28.3            | 19.9 <sup>c</sup>   |
| TS1-B    | 1.24 | 0.76 | 20.2           | 24.9            | 15.8                |
| TS1-C    | 1.63 | 0.37 | 18.6           | 23.3            | 20.0                |
| TS1-TF-A | 1.53 | 0.48 | 11.6           | 16.3            | 8.9 <sup>d</sup>    |
| TS1-TF-B | 1.20 | 0.80 | 17.9           | 21.4            | 11.1                |
| TS1-TF-C | 1.66 | 0.34 | 11.7           | 15.1            | 13.7                |

<sup>a</sup> cc-pVDZ basis set was employed instead of cc-pVTZ in the text due to computational costs. The CASPT2 energies are less accurate but the NOOs are the same. CASPT2(10,10)/6-31G(d) or cc-pVDZ//UB3LYP/6-31G(d), energies in kcal/mol

<sup>b</sup> UB3LYP/6-311++G(d,p)//UB3LYP/6-31G(d)

<sup>c</sup> 24.2 kcal/mol with RB3LYP/6-311++G(d,p)

<sup>d</sup> 13.2 kcal/mol with RB3LYP/6-311++G(d,p)

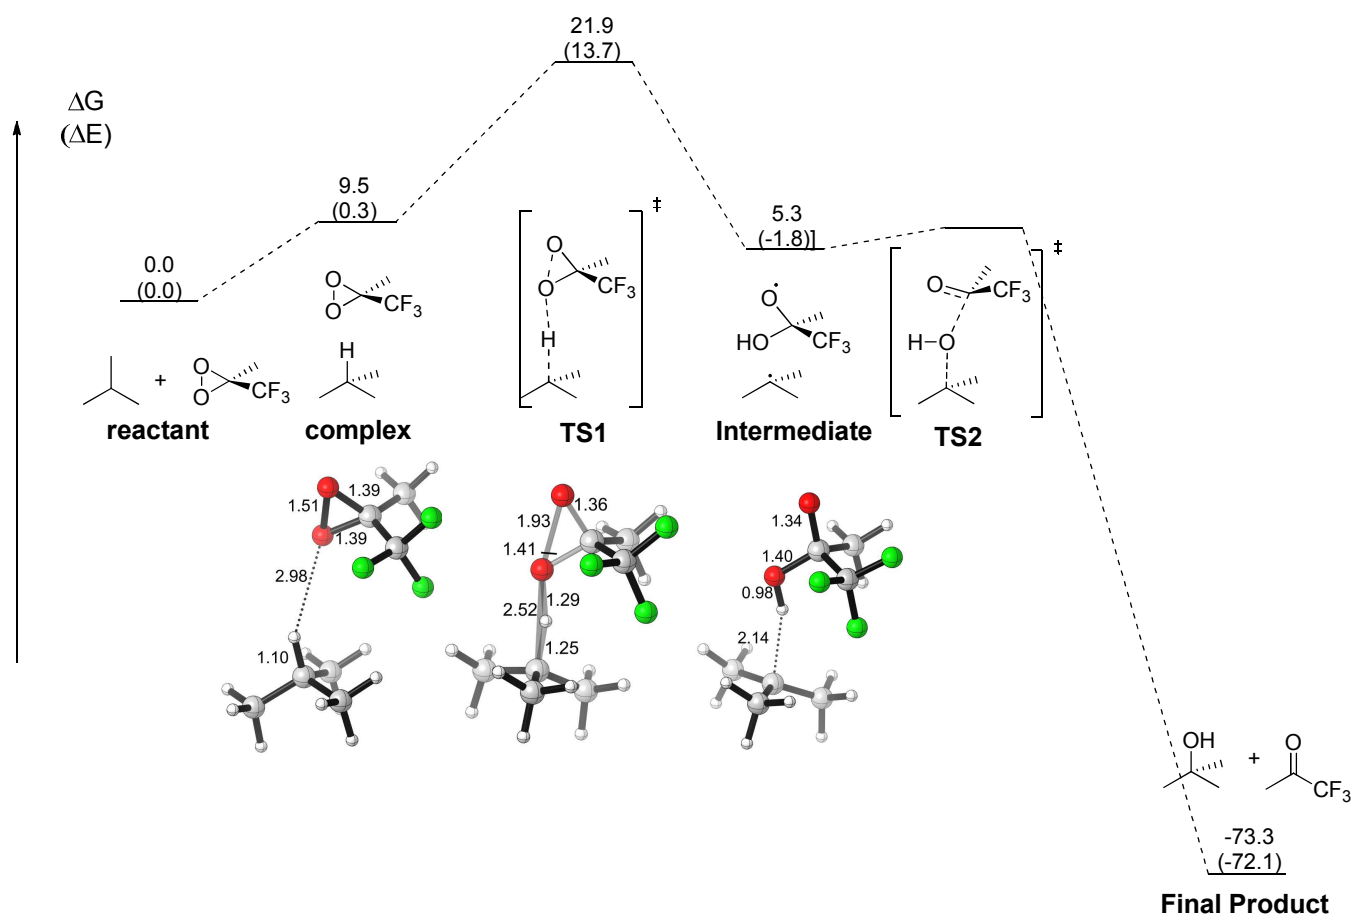

**Figure S4.** Reaction pathway in TFDO oxidations. Energy in kcal/mol. UB3LYP/6-311++G(d,p)//UB3LYP/6-31G(d).

The second TS has not been obtained. But it is expected to follow the same trend with low or no barrier as DMDO.

## Cartesian Coordinates for Dioxiranes and Alkanes

### DMDO:

|   |          |          |          |
|---|----------|----------|----------|
| O | -1.09041 | -0.00558 | 0.75263  |
| C | 0.09370  | 0.00026  | -0.00001 |
| O | -1.09044 | -0.00566 | -0.75262 |
| C | 0.86539  | 1.29794  | -0.00002 |
| H | 1.50689  | 1.36054  | 0.88623  |
| H | 1.50733  | 1.36030  | -0.88597 |
| H | 0.16862  | 2.13859  | -0.00030 |
| C | 0.87928  | -1.28877 | 0.00002  |
| H | 1.52182  | -1.34475 | 0.88617  |
| H | 0.19045  | -2.13635 | 0.00024  |
| H | 1.52146  | -1.34494 | -0.88639 |

### TFDO:

|   |          |          |          |
|---|----------|----------|----------|
| O | 1.38476  | -0.88012 | -0.75447 |
| C | 0.74142  | 0.09506  | -0.00015 |
| O | 1.38444  | -0.88021 | 0.75445  |
| C | 1.29799  | 1.49111  | -0.00003 |
| H | 0.95647  | 2.03235  | -0.88747 |
| H | 0.95549  | 2.03262  | 0.88689  |
| H | 2.38799  | 1.43588  | 0.00059  |
| C | -0.78696 | -0.02042 | -0.00005 |
| F | -1.28642 | 0.59694  | 1.09211  |
| F | -1.20085 | -1.28622 | -0.00117 |
| F | -1.28699 | 0.59897  | -1.09077 |

### *t*Bu-TFDO:

|   |          |          |          |
|---|----------|----------|----------|
| O | 0.12709  | 1.68599  | -0.76305 |
| C | 0.00643  | 0.52163  | -0.00167 |
| O | 0.04750  | 1.69957  | 0.74088  |
| C | -1.32297 | -0.25258 | -0.00539 |

|   |          |          |          |
|---|----------|----------|----------|
| C | 1.34574  | -0.24494 | 0.00791  |
| F | 1.34249  | -1.25282 | 0.90799  |
| F | 2.36919  | 0.56056  | 0.29588  |
| F | 1.56417  | -0.78333 | -1.21021 |
| C | -1.60757 | -0.72982 | 1.43810  |
| H | -2.57841 | -1.23624 | 1.46539  |
| H | -0.85132 | -1.43070 | 1.79923  |
| H | -1.65275 | 0.11911  | 2.12885  |
| C | -2.44609 | 0.70532  | -0.45089 |
| H | -2.31742 | 1.02055  | -1.49016 |
| H | -3.40876 | 0.19030  | -0.36471 |
| H | -2.47721 | 1.60099  | 0.17542  |
| C | -1.27065 | -1.46036 | -0.96468 |
| H | -1.02888 | -1.15345 | -1.98766 |
| H | -0.53935 | -2.20973 | -0.64977 |
| H | -2.25470 | -1.94062 | -0.98234 |

**Isobutane:**

|   |          |          |          |
|---|----------|----------|----------|
| C | -0.39569 | 1.40733  | 0.09594  |
| C | 0.00012  | 0.00002  | -0.37317 |
| H | 0.00007  | 0.00025  | -1.47372 |
| H | 0.31302  | 2.16282  | -0.26416 |
| H | -1.39349 | 1.68304  | -0.26613 |
| H | -0.41256 | 1.46277  | 1.19251  |
| C | -1.02120 | -1.04624 | 0.09582  |
| C | 1.41685  | -0.36109 | 0.09590  |
| H | -0.76152 | -2.04863 | -0.26549 |
| H | -1.06146 | -1.08817 | 1.19243  |
| H | -2.02974 | -0.81022 | -0.26466 |
| H | 1.47291  | -0.37643 | 1.19247  |
| H | 1.71775  | -1.35174 | -0.26587 |
| H | 2.15452  | 0.36616  | -0.26433 |



**Cyclohexane (2):**

|   |          |          |          |
|---|----------|----------|----------|
| C | -1.45730 | -0.17163 | -0.22934 |
| C | -0.57991 | -1.34752 | 0.22937  |
| C | 0.87722  | -1.17588 | -0.22942 |
| C | 1.45729  | 0.17162  | 0.22935  |
| C | 0.57991  | 1.34751  | -0.22937 |
| C | -0.87722 | 1.17589  | 0.22940  |
| H | 1.49412  | -2.00271 | 0.14590  |
| H | -0.60686 | -1.41019 | 1.32770  |
| H | -0.98717 | -2.29519 | -0.14628 |
| H | -1.52515 | -0.17943 | -1.32764 |
| H | -2.48173 | -0.29227 | 0.14634  |
| H | 1.52512  | 0.17941  | 1.32766  |
| H | 2.48174  | 0.29227  | -0.14630 |
| H | 0.98718  | 2.29518  | 0.14630  |
| H | 0.60689  | 1.41020  | -1.32770 |
| H | -0.91754 | 1.22998  | 1.32774  |
| H | -1.49411 | 2.00270  | -0.14595 |
| H | 0.91752  | -1.22995 | -1.32776 |

**1,4-Dimethylcyclohexane (3):**

|   |          |          |          |
|---|----------|----------|----------|
| C | -0.79029 | 1.26301  | -0.64210 |
| C | -1.62614 | 0.00001  | -0.33997 |
| C | -0.79029 | -1.26300 | -0.64217 |
| C | 0.57901  | -1.26192 | 0.05766  |
| C | 1.39733  | 0.00002  | -0.27145 |
| C | 0.57903  | 1.26198  | 0.05767  |
| H | -2.48568 | -0.00000 | -1.02595 |
| H | -0.62774 | 1.32450  | -1.72826 |
| H | -1.35627 | 2.16221  | -0.36357 |
| H | -0.62771 | -1.32440 | -1.72834 |
| H | 1.14334  | -2.15835 | -0.23340 |
| H | 1.58236  | 0.00006  | -1.35844 |

|   |          |          |          |
|---|----------|----------|----------|
| H | 1.14339  | 2.15839  | -0.23341 |
| C | -2.19756 | -0.00005 | 1.08771  |
| H | -2.82148 | 0.88585  | 1.25774  |
| H | -2.82209 | -0.88556 | 1.25745  |
| H | -1.41415 | -0.00041 | 1.85349  |
| H | -1.35625 | -2.16219 | -0.36367 |
| H | 0.44654  | -1.32681 | 1.14780  |
| H | 0.44660  | 1.32689  | 1.14782  |
| C | 2.75462  | -0.00005 | 0.44050  |
| H | 3.34436  | -0.88638 | 0.17635  |
| H | 3.34444  | 0.88624  | 0.17641  |
| H | 2.62608  | -0.00008 | 1.53093  |

**1,2-Dimethylcyclohexane (4):**

|   |          |          |          |
|---|----------|----------|----------|
| C | 0.38440  | 0.96260  | -0.43367 |
| C | 0.86211  | -0.51638 | -0.46371 |
| C | 0.01715  | -1.40560 | 0.46994  |
| C | -1.48399 | -1.31233 | 0.15623  |
| C | -1.97479 | 0.14300  | 0.17563  |
| C | -1.12623 | 1.02615  | -0.75334 |
| H | 0.35439  | -2.44754 | 0.38466  |
| H | 0.67866  | -0.87104 | -1.49099 |
| H | 0.91370  | 1.48681  | -1.24382 |
| H | -1.66951 | -1.74035 | -0.84039 |
| H | -2.05914 | -1.91986 | 0.86695  |
| H | -3.02944 | 0.19221  | -0.12469 |
| H | -1.93053 | 0.53006  | 1.20331  |
| H | -1.28029 | 0.69268  | -1.79028 |
| H | -1.47234 | 2.06754  | -0.70830 |
| H | 0.19238  | -1.11422 | 1.51582  |
| C | 2.36343  | -0.67582 | -0.19168 |
| H | 2.68291  | -1.70952 | -0.37123 |
| H | 2.95950  | -0.02473 | -0.84342 |

|   |         |          |         |
|---|---------|----------|---------|
| H | 2.61723 | -0.43126 | 0.84646 |
| C | 0.72519 | 1.70565  | 0.87051 |
| H | 1.80684 | 1.75855  | 1.03315 |
| H | 0.34967 | 2.73525  | 0.82964 |
| H | 0.28237 | 1.23182  | 1.75360 |

**Axial methylcyclohexane (5):**

|   |          |          |          |
|---|----------|----------|----------|
| C | -0.25252 | 1.26492  | 0.63125  |
| C | 0.95141  | 1.26952  | -0.32561 |
| C | 1.80205  | -0.00018 | -0.16186 |
| C | 0.95117  | -1.26956 | -0.32572 |
| C | -0.25254 | -1.26471 | 0.63150  |
| C | -1.13005 | -0.00000 | 0.49385  |
| H | 0.60323  | 1.34240  | -1.36553 |
| H | 1.56428  | 2.16218  | -0.14545 |
| H | 0.12195  | 1.32149  | 1.66407  |
| H | -0.86460 | 2.16333  | 0.47443  |
| H | 0.60257  | -1.34224 | -1.36553 |
| H | 2.25749  | -0.00022 | 0.84012  |
| H | 1.56374  | -2.16244 | -0.14576 |
| H | 2.63139  | -0.00017 | -0.88099 |
| H | 0.12207  | -1.32111 | 1.66424  |
| H | -1.84413 | 0.00006  | 1.33021  |
| H | -0.86463 | -2.16330 | 0.47491  |
| C | -1.96065 | -0.00001 | -0.80075 |
| H | -2.60606 | -0.88549 | -0.85027 |
| H | -2.60552 | 0.88586  | -0.85034 |
| H | -1.33502 | -0.00025 | -1.70012 |

**diaxial 1,3-dimethylcyclohexane (6):**

|   |          |          |         |
|---|----------|----------|---------|
| C | -0.00016 | -0.73212 | 1.17657 |
| C | -1.31759 | -0.30919 | 0.48022 |
| C | -1.26623 | 1.19006  | 0.11081 |

|   |          |          |          |
|---|----------|----------|----------|
| C | 0.00037  | 1.56658  | -0.67428 |
| C | 1.26666  | 1.18955  | 0.11099  |
| C | 1.31745  | -0.30966 | 0.48036  |
| H | -2.11382 | -0.43417 | 1.22876  |
| H | -0.00022 | -0.27320 | 2.17612  |
| H | -0.00037 | -1.81854 | 1.34207  |
| H | -1.28849 | 1.78306  | 1.03715  |
| H | 0.00068  | 2.64400  | -0.88385 |
| H | 1.28918  | 1.78264  | 1.03727  |
| H | 2.11361  | -0.43490 | 1.22893  |
| H | 2.16597  | 1.46599  | -0.45570 |
| C | 1.71770  | -1.19138 | -0.71493 |
| H | 2.73751  | -0.95108 | -1.04018 |
| H | 1.69639  | -2.25418 | -0.44531 |
| H | 1.06188  | -1.05880 | -1.58051 |
| C | -1.71816 | -1.19094 | -0.71483 |
| H | -1.69813 | -2.25363 | -0.44461 |
| H | -2.73757 | -0.94978 | -1.04059 |
| H | -1.06182 | -1.05965 | -1.58015 |
| H | -2.16538 | 1.46693  | -0.45585 |
| H | 0.00029  | 1.06789  | -1.65291 |

**1,3,5-trimethylcyclohexane (7):**

|   |          |          |          |
|---|----------|----------|----------|
| C | -1.42358 | 0.34963  | -0.80782 |
| C | -1.05133 | -1.09615 | -0.40130 |
| C | 0.40914  | -1.40805 | -0.80692 |
| C | 1.47520  | -0.36238 | -0.40095 |
| C | 1.01520  | 1.05797  | -0.80707 |
| C | -0.42373 | 1.45851  | -0.40149 |
| H | -1.68214 | -1.75419 | -1.01752 |
| H | -1.49944 | 0.36802  | -1.90489 |
| H | -2.42601 | 0.59570  | -0.43091 |
| H | 0.43127  | -1.48367 | -1.90398 |

|   |          |          |          |
|---|----------|----------|----------|
| H | 2.36029  | -0.58008 | -1.01731 |
| H | 1.07000  | 1.11510  | -1.90412 |
| H | -0.67746 | 2.33413  | -1.01761 |
| H | 1.72922  | 1.80279  | -0.42917 |
| C | -0.56419 | 1.94054  | 1.05340  |
| H | 0.11458  | 2.78098  | 1.24464  |
| H | -1.58644 | 2.29099  | 1.24280  |
| H | -0.34292 | 1.16921  | 1.79446  |
| C | -1.40003 | -1.45802 | 1.05348  |
| H | -2.46775 | -1.29110 | 1.24292  |
| H | -1.19189 | -2.51815 | 1.24430  |
| H | -0.84445 | -0.87939 | 1.79482  |
| C | 1.96345  | -0.48217 | 1.05354  |
| H | 2.35511  | -1.48920 | 1.24370  |
| H | 2.77602  | 0.23007  | 1.24364  |
| H | 1.18415  | -0.29137 | 1.79462  |
| H | 0.69710  | -2.39915 | -0.42958 |

**8:**

|   |          |          |          |
|---|----------|----------|----------|
| C | -3.27801 | 0.62165  | 0.04864  |
| C | -1.95213 | -0.05724 | -0.44042 |
| C | -1.87641 | -1.60130 | -0.26541 |
| C | -3.12375 | -2.24389 | -0.91187 |
| C | -4.44266 | -1.63939 | -0.40912 |
| C | -4.46828 | -0.11710 | -0.61306 |
| H | -1.01017 | -1.91674 | -0.86107 |
| H | -1.95122 | 0.09417  | -1.53311 |
| H | -3.06909 | -2.10046 | -2.00122 |
| H | -3.11144 | -3.32854 | -0.74160 |
| H | -5.28679 | -2.09402 | -0.94341 |
| H | -4.44958 | 0.08945  | -1.69371 |
| H | -5.41096 | 0.30279  | -0.23534 |
| C | -1.62163 | -2.13251 | 1.15847  |

|   |          |          |          |
|---|----------|----------|----------|
| H | -1.40480 | -3.20670 | 1.10921  |
| H | -0.76175 | -1.64860 | 1.63305  |
| H | -2.47988 | -2.01015 | 1.82490  |
| C | -3.47244 | 0.62322  | 1.58400  |
| H | -2.60050 | 0.99815  | 2.12782  |
| H | -4.32027 | 1.27019  | 1.84229  |
| H | -3.69348 | -0.37005 | 1.97880  |
| H | -4.59123 | -1.88520 | 0.65025  |
| C | -0.71870 | 0.70147  | 0.07594  |
| H | -0.62037 | 0.61907  | 1.15978  |
| C | -3.25910 | 2.09129  | -0.44632 |
| H | -3.26593 | 2.09400  | -1.54633 |
| H | -4.18222 | 2.59484  | -0.12860 |
| C | -0.72775 | 2.17184  | -0.35198 |
| C | -2.03385 | 2.87658  | 0.04323  |
| H | -2.04454 | 3.88937  | -0.37800 |
| H | -2.07509 | 2.99980  | 1.13293  |
| H | 0.13983  | 2.68300  | 0.08246  |
| H | -0.60691 | 2.20557  | -1.44366 |
| O | 0.46863  | 0.08877  | -0.50878 |
| C | 1.47886  | -0.24737 | 0.32568  |
| O | 1.48608  | -0.11123 | 1.53593  |
| N | 2.49774  | -0.81573 | -0.40064 |
| H | 2.43237  | -0.75806 | -1.40762 |
| C | 3.77918  | -1.08184 | 0.20038  |
| H | 4.18107  | -2.04163 | -0.14111 |
| H | 3.64369  | -1.11903 | 1.28260  |
| C | 4.80907  | -0.00986 | -0.12472 |
| F | 4.44042  | 1.20172  | 0.32718  |
| F | 4.98723  | 0.09469  | -1.46474 |
| F | 6.00157  | -0.31918 | 0.42392  |

9:

|   |          |          |          |
|---|----------|----------|----------|
| C | -3.39959 | 0.69586  | 0.15058  |
| C | -2.12132 | -0.00446 | -0.38199 |
| C | -2.13903 | -1.54073 | -0.14426 |
| C | -3.42082 | -2.13632 | -0.76545 |
| C | -4.70016 | -1.47415 | -0.23398 |
| C | -4.66129 | 0.04504  | -0.44482 |
| H | -1.28435 | -1.95601 | -0.69394 |
| H | -2.10921 | 0.14455  | -1.47481 |
| H | -3.38199 | -2.00238 | -1.85671 |
| H | -3.44892 | -3.21916 | -0.58634 |
| H | -5.57900 | -1.90031 | -0.73464 |
| H | -4.69007 | 0.25968  | -1.52438 |
| H | -5.55509 | 0.51480  | -0.01266 |
| C | -1.96900 | -1.95880 | 1.32861  |
| H | -2.02297 | -3.05095 | 1.41395  |
| H | -1.00046 | -1.64793 | 1.73310  |
| H | -2.74803 | -1.54454 | 1.97830  |
| H | -3.43192 | 0.56263  | 1.24370  |
| H | -4.81998 | -1.69445 | 0.83555  |
| C | -3.36688 | 2.20897  | -0.12857 |
| H | -4.26060 | 2.68096  | 0.30073  |
| H | -3.42054 | 2.37270  | -1.21566 |
| C | -0.86679 | 0.68922  | 0.16742  |
| H | -0.77507 | 0.52998  | 1.24421  |
| C | -2.09852 | 2.87397  | 0.42010  |
| C | -0.84017 | 2.18870  | -0.12987 |
| H | -2.08361 | 3.94119  | 0.16760  |
| H | -2.09753 | 2.81388  | 1.51802  |
| H | -0.78077 | 2.33212  | -1.21759 |
| H | 0.06639  | 2.62702  | 0.30440  |
| O | 0.29664  | 0.08051  | -0.46477 |
| C | 1.32159  | -0.29185 | 0.33587  |
| O | 1.35200  | -0.20415 | 1.55016  |

|   |         |          |          |
|---|---------|----------|----------|
| N | 2.32451 | -0.83414 | -0.43182 |
| H | 2.24126 | -0.73317 | -1.43411 |
| C | 3.61766 | -1.12124 | 0.13355  |
| H | 3.50309 | -1.20066 | 1.21589  |
| H | 4.01409 | -2.06621 | -0.25270 |
| C | 4.64003 | -0.03551 | -0.16916 |
| F | 4.27844 | 1.15735  | 0.33523  |
| F | 5.84276 | -0.36329 | 0.34536  |
| F | 4.79328 | 0.12063  | -1.50728 |

**10:**

|   |          |          |          |
|---|----------|----------|----------|
| C | -2.69943 | -0.35986 | -0.25468 |
| C | -3.11687 | 1.06276  | -0.71727 |
| C | -2.34188 | 2.21122  | -0.05920 |
| C | -0.82503 | 2.04108  | -0.22547 |
| C | -0.30948 | 0.68116  | 0.31050  |
| C | -1.14212 | -0.46638 | -0.38648 |
| H | -2.96759 | 1.12431  | -1.80571 |
| H | -4.19468 | 1.19259  | -0.54944 |
| H | -0.57711 | 2.11866  | -1.29468 |
| H | -0.29548 | 2.86238  | 0.27606  |
| H | -0.96914 | -0.29253 | -1.46168 |
| H | -2.60381 | 2.28342  | 1.00401  |
| C | -3.24459 | -0.65470 | 1.15926  |
| H | -4.34063 | -0.69229 | 1.13245  |
| H | -2.89730 | -1.62581 | 1.53064  |
| H | -2.96488 | 0.10134  | 1.89570  |
| C | -0.36873 | 0.70419  | 1.85728  |
| H | -0.43751 | -0.28989 | 2.30310  |
| H | 0.52385  | 1.18901  | 2.26831  |
| H | -1.22640 | 1.27447  | 2.22066  |
| C | -3.37189 | -1.36109 | -1.22212 |
| H | -3.26712 | -2.39900 | -0.88850 |



|   |          |          |          |
|---|----------|----------|----------|
| H | -4.44629 | -1.15120 | -1.29048 |
| H | -2.95481 | -1.28621 | -2.23413 |
| C | 1.13097  | 0.45165  | -0.20943 |
| C | -0.55191 | -1.87118 | -0.10790 |
| H | -1.13801 | -2.62744 | -0.63903 |
| H | -0.63848 | -2.12180 | 0.95680  |
| C | 1.76693  | -0.92519 | 0.10309  |
| C | 0.92274  | -2.01157 | -0.55807 |
| H | 1.30165  | -3.01134 | -0.31335 |
| H | 0.99117  | -1.89732 | -1.64729 |
| O | 3.07619  | -0.77617 | -0.54181 |
| C | 3.47109  | 0.53403  | -0.47922 |
| O | 4.56729  | 0.89231  | -0.82226 |
| C | 2.08334  | -1.27977 | 1.56481  |
| H | 2.80165  | -2.10588 | 1.55751  |
| H | 2.54205  | -0.44762 | 2.10709  |
| H | 1.20190  | -1.60318 | 2.12122  |
| C | 2.30986  | 1.39454  | 0.03979  |
| H | 2.47709  | 1.63401  | 1.09724  |
| H | 2.27818  | 2.33677  | -0.51196 |
| H | 1.02841  | 0.43574  | -1.30523 |
| H | -2.65259 | 3.16417  | -0.50605 |

### Cartesian Coordinates for Transition states

#### TS1-A:

|   |            |             |             |
|---|------------|-------------|-------------|
| C | 1.79987500 | -0.00033600 | 0.03360400  |
| H | 0.37475500 | -0.39848300 | -0.27379000 |
| C | 1.88103200 | 1.49676100  | 0.08875400  |
| H | 1.65141000 | 1.94678700  | -0.87919100 |
| H | 1.20426100 | 1.91223800  | 0.84045400  |
| H | 2.90788100 | 1.78668900  | 0.36946000  |
| C | 1.87192800 | -0.72621700 | 1.35198300  |

|   |             |             |             |
|---|-------------|-------------|-------------|
| H | 2.89939600  | -0.64050300 | 1.74501000  |
| H | 1.20489800  | -0.28441000 | 2.09929500  |
| H | 1.64884600  | -1.79338900 | 1.25477100  |
| C | 2.42718800  | -0.67021600 | -1.15749800 |
| H | 2.21345600  | -1.74291100 | -1.18840600 |
| H | 2.08998800  | -0.21260600 | -2.09131800 |
| H | 3.52250200  | -0.55109300 | -1.10147600 |
| O | -0.41343300 | 0.04210900  | -0.80911600 |
| C | -1.76654300 | -0.00869800 | -0.10886700 |
| O | -2.44543000 | 0.12837300  | -1.22281200 |
| C | -1.85138200 | 1.17493200  | 0.86506200  |
| C | -1.91121600 | -1.37552500 | 0.58257100  |
| H | -1.66712400 | 2.10055700  | 0.31357600  |
| H | -2.85778900 | 1.22346500  | 1.29713000  |
| H | -1.13369300 | 1.09138000  | 1.69268000  |
| H | -2.92510200 | -1.46898400 | 0.98743100  |
| H | -1.76239600 | -2.16673400 | -0.15753900 |
| H | -1.20566900 | -1.51006600 | 1.41367500  |

**TS1-B:**

|   |             |             |             |
|---|-------------|-------------|-------------|
| C | -1.74558700 | -0.02612500 | 0.02628900  |
| H | -0.57627500 | -0.17818600 | 0.40860600  |
| C | -2.54816800 | -0.09304800 | 1.31771100  |
| H | -2.36056600 | -1.02881300 | 1.85502900  |
| H | -2.30674200 | 0.74108800  | 1.98584400  |
| H | -3.62564200 | -0.04347200 | 1.09836200  |
| C | -1.82839400 | 1.31666500  | -0.68521200 |
| H | -2.85157600 | 1.48096000  | -1.05659000 |
| H | -1.58987800 | 2.14862400  | -0.01251000 |
| H | -1.15262700 | 1.35555600  | -1.54564100 |
| C | -1.94378900 | -1.22111000 | -0.89465300 |
| H | -1.23086700 | -1.19512600 | -1.72411200 |
| H | -1.80569700 | -2.16349200 | -0.35426300 |

|   |             |             |             |
|---|-------------|-------------|-------------|
| H | -2.96213400 | -1.21645700 | -1.31199400 |
| O | 0.62425400  | -0.60565700 | 0.81628300  |
| C | 1.58994700  | -0.03177200 | -0.00564800 |
| O | 1.36316200  | -0.11339900 | -1.33552200 |
| C | 2.89093300  | -0.84647800 | 0.31505100  |
| C | 1.81982600  | 1.47869900  | 0.32705800  |
| H | 2.73170400  | -1.89252300 | 0.04628000  |
| H | 3.72117000  | -0.43565000 | -0.26395000 |
| H | 3.10216500  | -0.77423000 | 1.38437700  |
| H | 2.66292700  | 1.87801300  | -0.24143200 |
| H | 0.92196000  | 2.05158500  | 0.08253800  |
| H | 2.01414700  | 1.56357800  | 1.39979600  |

**TS1-C:**

|   |             |             |             |
|---|-------------|-------------|-------------|
| C | -1.75165400 | -0.00633900 | 0.01548700  |
| H | -0.50608600 | -0.02829600 | -0.32757700 |
| C | -2.09500100 | 1.46869100  | -0.07171300 |
| H | -1.52714800 | 2.06090500  | 0.65348500  |
| H | -1.89674600 | 1.86348200  | -1.07284900 |
| H | -3.16453400 | 1.61553500  | 0.14315600  |
| C | -2.37943000 | -0.87070800 | -1.06158100 |
| H | -3.46949400 | -0.91713400 | -0.91541600 |
| H | -2.19151500 | -0.46191300 | -2.05915800 |
| H | -1.99352000 | -1.89452600 | -1.02986600 |
| C | -1.79710800 | -0.59569300 | 1.41212700  |
| H | -1.41950500 | -1.62324900 | 1.43110000  |
| H | -1.22370900 | 0.00304300  | 2.12826800  |
| H | -2.83879400 | -0.62078400 | 1.76783000  |
| O | 0.56582500  | -0.01738600 | -0.91523000 |
| C | 1.71893900  | 0.00147700  | -0.07078900 |
| O | 2.51273100  | 0.05932600  | -1.18983000 |
| C | 1.89296500  | -1.29663000 | 0.71875400  |
| C | 1.79504400  | 1.26418800  | 0.78913000  |

|   |            |             |            |
|---|------------|-------------|------------|
| H | 1.78950600 | -2.14466700 | 0.03698900 |
| H | 2.89062900 | -1.32940000 | 1.17141200 |
| H | 1.15490100 | -1.38502200 | 1.52474700 |
| H | 2.78168900 | 1.34035800  | 1.26006900 |
| H | 1.64118100 | 2.13946500  | 0.15283100 |
| H | 1.04216500 | 1.25676600  | 1.58697400 |

**TS1-TF-A:**

|   |             |             |             |
|---|-------------|-------------|-------------|
| C | -2.30715800 | -0.12761600 | 0.03600900  |
| H | -0.99026100 | 0.46776900  | -0.13495000 |
| C | -2.33011900 | -0.18538300 | 1.53877500  |
| H | -1.51864100 | -0.80228200 | 1.93246000  |
| H | -2.28714100 | 0.81032600  | 1.99049800  |
| H | -3.28181500 | -0.64746400 | 1.85179600  |
| C | -3.14924200 | 0.92311200  | -0.62842900 |
| H | -4.20520200 | 0.60819800  | -0.58138300 |
| H | -3.06932200 | 1.89050700  | -0.12497400 |
| H | -2.88270900 | 1.04364200  | -1.68144800 |
| C | -2.11933400 | -1.42306400 | -0.69971200 |
| H | -1.89129800 | -1.25394700 | -1.75489800 |
| H | -1.32828900 | -2.03025000 | -0.25470500 |
| H | -3.06049800 | -1.99518200 | -0.64272800 |
| O | -0.21230400 | 0.89465600  | -0.74422200 |
| C | 1.13393200  | 0.88571400  | -0.15481700 |
| O | 1.71741300  | 1.47667300  | -1.17121700 |
| C | 1.54886400  | -0.60023900 | 0.01355200  |
| C | 1.17789700  | 1.63238700  | 1.18284000  |
| F | 2.81391800  | -0.70296100 | 0.46524400  |
| F | 1.45101900  | -1.29714600 | -1.12514300 |
| F | 0.75138700  | -1.24125300 | 0.93659500  |
| H | 2.21154900  | 1.68420800  | 1.53802900  |
| H | 0.81441500  | 2.64775700  | 1.00848500  |
| H | 0.57239000  | 1.14885700  | 1.95776400  |

**TS1-TF-B:**

|   |             |             |             |
|---|-------------|-------------|-------------|
| C | 2.25030100  | -0.09408500 | 0.02097000  |
| H | 1.14095600  | 0.40204800  | -0.25056600 |
| C | 2.18956700  | -1.46117300 | -0.63851500 |
| H | 1.39412100  | -2.07714200 | -0.21076100 |
| H | 2.02250700  | -1.37520300 | -1.71651700 |
| H | 3.14509200  | -1.98484600 | -0.48529800 |
| C | 3.21134000  | 0.88222700  | -0.63510800 |
| H | 4.24479300  | 0.53129400  | -0.49590400 |
| H | 3.02644400  | 0.96209200  | -1.71072900 |
| H | 3.13477300  | 1.88116100  | -0.19411100 |
| C | 2.31219100  | -0.12220800 | 1.53852300  |
| H | 2.24699300  | 0.88397300  | 1.96616500  |
| H | 1.51519100  | -0.74036700 | 1.96140200  |
| H | 3.27378400  | -0.55364000 | 1.85491700  |
| O | 0.11499900  | 0.94967400  | -0.81650400 |
| C | -1.10674400 | 0.85965700  | -0.11486000 |
| O | -1.70360200 | 1.49017800  | -1.15929900 |
| C | -1.15639200 | 1.60119900  | 1.21366600  |
| C | -1.55731200 | -0.61353900 | 0.01407400  |
| H | -0.80634800 | 2.62171300  | 1.04390300  |
| H | -2.18578000 | 1.63254200  | 1.58375200  |
| H | -0.53232700 | 1.11728200  | 1.97103900  |
| F | -2.83444200 | -0.68260900 | 0.44131900  |
| F | -0.79054000 | -1.27401400 | 0.93168900  |
| F | -1.46047100 | -1.28028700 | -1.14005000 |

**1-TF-C:**

|   |             |             |             |
|---|-------------|-------------|-------------|
| C | -2.28570100 | -0.03879600 | -0.02368300 |
| H | -1.18521400 | 0.35114600  | -0.33767000 |
| C | -2.49340700 | -1.31289000 | -0.83184800 |
| H | -2.42705300 | -1.11949400 | -1.90787100 |
| H | -1.75401300 | -2.07597800 | -0.57109800 |

|   |             |             |             |
|---|-------------|-------------|-------------|
| H | -3.49205000 | -1.72696800 | -0.62712100 |
| C | -2.25914300 | -0.25661100 | 1.48417200  |
| H | -3.25638200 | -0.56673700 | 1.83067500  |
| H | -1.54814400 | -1.03908000 | 1.76435700  |
| H | -1.98710500 | 0.66111300  | 2.01461000  |
| C | -3.17727800 | 1.11812400  | -0.45670200 |
| H | -2.91994100 | 2.03925500  | 0.07629300  |
| H | -3.09387300 | 1.30755100  | -1.53207400 |
| H | -4.22943300 | 0.88376800  | -0.23659100 |
| O | -0.03245200 | 0.98772900  | -0.84279500 |
| C | 0.99951400  | 0.80469000  | 0.04597100  |
| O | 0.79230600  | 1.14571900  | 1.32955100  |
| C | 2.14128600  | 1.77155800  | -0.46170600 |
| C | 1.54001100  | -0.66439900 | -0.01862200 |
| H | 1.77390500  | 2.79449200  | -0.38294300 |
| H | 3.02888100  | 1.62959500  | 0.15560000  |
| H | 2.34500800  | 1.51971400  | -1.50370300 |
| F | 1.86812500  | -1.00040500 | -1.27805200 |
| F | 2.62841400  | -0.82389200 | 0.75237700  |
| F | 0.60067200  | -1.53748300 | 0.40767400  |

### Reaction pathways of DMDO-isobutane:

Complex:

|   |          |          |          |
|---|----------|----------|----------|
| C | -2.27100 | 0.00599  | -0.00315 |
| H | -1.17939 | -0.05481 | -0.12585 |
| C | -2.89526 | 0.04685  | -1.40494 |
| H | -2.55038 | 0.92058  | -1.97107 |
| H | -2.63639 | -0.84886 | -1.98165 |
| H | -3.99054 | 0.10042  | -1.34415 |
| C | -2.72287 | -1.24251 | 0.76700  |
| H | -3.81110 | -1.23954 | 0.91514  |
| H | -2.46209 | -2.15935 | 0.22553  |
| H | -2.25329 | -1.29326 | 1.75691  |

|   |          |          |          |
|---|----------|----------|----------|
| C | -2.59036 | 1.28614  | 0.78203  |
| H | -2.12267 | 1.27445  | 1.77442  |
| H | -2.23598 | 2.17955  | 0.25313  |
| H | -3.67313 | 1.39629  | 0.92828  |
| O | 1.32429  | -0.75653 | -0.63826 |
| C | 2.25968  | 0.04914  | 0.02881  |
| O | 2.80959  | -0.91843 | -0.82671 |
| C | 2.41815  | -0.21484 | 1.50652  |
| C | 2.35605  | 1.47779  | -0.44969 |
| H | 2.32301  | -1.28538 | 1.69922  |
| H | 3.39931  | 0.12904  | 1.85260  |
| H | 1.65231  | 0.32457  | 2.07511  |
| H | 3.33411  | 1.90013  | -0.19342 |
| H | 2.22201  | 1.51018  | -1.53282 |
| H | 1.58686  | 2.09425  | 0.02894  |

Intermediate:

|   |          |          |          |
|---|----------|----------|----------|
| C | -2.19424 | 0.00337  | 0.01177  |
| H | 0.00889  | -0.10989 | -0.38159 |
| C | -2.21069 | 1.38339  | -0.57957 |
| H | -1.88025 | 2.14169  | 0.14034  |
| H | -1.57052 | 1.45057  | -1.46725 |
| H | -3.22957 | 1.67127  | -0.89856 |
| C | -2.37807 | -1.16096 | -0.91838 |
| H | -3.42992 | -1.24640 | -1.24907 |
| H | -1.76927 | -1.05789 | -1.82425 |
| H | -2.12109 | -2.11299 | -0.43872 |
| C | -2.58020 | -0.16538 | 1.45135  |
| H | -2.26605 | -1.13856 | 1.84860  |
| H | -2.15491 | 0.62217  | 2.08580  |
| H | -3.67719 | -0.11415 | 1.58446  |
| O | 0.81273  | -0.09910 | -0.93602 |
| C | 1.95532  | -0.01659 | -0.09264 |

|   |         |          |          |
|---|---------|----------|----------|
| O | 3.08006 | -0.00311 | -0.82432 |
| C | 2.01864 | -1.25959 | 0.84518  |
| C | 1.91779 | 1.30377  | 0.73462  |
| H | 2.06657 | -2.16450 | 0.23475  |
| H | 2.89575 | -1.20889 | 1.49448  |
| H | 1.11283 | -1.29281 | 1.46040  |
| H | 2.79592 | 1.37919  | 1.38011  |
| H | 1.89313 | 2.15374  | 0.04857  |
| H | 1.01203 | 1.31701  | 1.35061  |

Second TS:

|   |          |          |          |
|---|----------|----------|----------|
| C | 2.06243  | -0.00818 | 0.04490  |
| H | -0.36114 | 0.61631  | -1.27906 |
| C | 2.46398  | 1.22295  | -0.69697 |
| H | 2.32281  | 1.11776  | -1.77830 |
| H | 1.89998  | 2.09616  | -0.34960 |
| H | 3.53363  | 1.44976  | -0.53456 |
| C | 1.94587  | 0.06682  | 1.52903  |
| H | 2.94478  | 0.07401  | 2.00197  |
| H | 1.43671  | 0.98547  | 1.83977  |
| H | 1.40185  | -0.79061 | 1.93777  |
| C | 2.17514  | -1.34034 | -0.61498 |
| H | 1.51124  | -2.07657 | -0.15073 |
| H | 1.94758  | -1.28778 | -1.68498 |
| H | 3.20426  | -1.73605 | -0.52756 |
| O | -0.38553 | 0.40042  | -0.33056 |
| C | -1.80756 | -0.01085 | -0.14843 |
| O | -2.44495 | 0.01165  | -1.30795 |
| C | -2.41722 | 1.06353  | 0.79817  |
| C | -1.78465 | -1.40357 | 0.51679  |
| H | -2.41190 | 2.03082  | 0.29031  |
| H | -3.44552 | 0.79623  | 1.05717  |
| H | -1.81157 | 1.12762  | 1.70825  |



|   |          |          |          |
|---|----------|----------|----------|
| H | -2.81032 | -1.71984 | 0.72976  |
| H | -1.33530 | -2.12422 | -0.17299 |
| H | -1.21122 | -1.39781 | 1.44977  |

Acetone:

|   |          |          |          |
|---|----------|----------|----------|
| C | -0.00000 | 0.18532  | -0.00000 |
| O | 0.00000  | 1.40098  | 0.00000  |
| C | -1.29310 | -0.61480 | 0.00001  |
| H | -1.34131 | -1.26754 | 0.88083  |
| H | -2.14854 | 0.06354  | 0.00026  |
| H | -1.34153 | -1.26711 | -0.88113 |
| C | 1.29310  | -0.61480 | -0.00001 |
| H | 1.34155  | -1.26708 | 0.88115  |
| H | 1.34130  | -1.26757 | -0.88081 |
| H | 2.14853  | 0.06355  | -0.00029 |

tBuOH:

|   |          |          |          |
|---|----------|----------|----------|
| C | 0.68723  | 1.26751  | -0.50955 |
| C | -0.00545 | -0.00002 | 0.01384  |
| H | 0.20346  | 2.16017  | -0.09957 |
| H | 1.74411  | 1.28478  | -0.21137 |
| H | 0.65163  | 1.32314  | -1.60387 |
| C | 0.69417  | -1.26347 | -0.51017 |
| C | -1.49037 | -0.00394 | -0.35739 |
| H | 0.21555  | -2.15899 | -0.10039 |
| H | 0.65862  | -1.31890 | -1.60449 |
| H | 1.75123  | -1.27490 | -0.21230 |
| H | -1.62225 | -0.00364 | -1.44468 |
| H | -1.98124 | -0.89201 | 0.05409  |
| H | -1.98612 | 0.88091  | 0.05517  |
| O | 0.01342  | -0.00030 | 1.45234  |
| H | 0.94415  | 0.00136  | 1.72840  |

## Reaction pathways of TFDO-isobutane:

### Complex:

|   |          |          |          |
|---|----------|----------|----------|
| C | -2.69147 | -0.14100 | -0.07921 |
| H | -1.88495 | -0.38130 | -0.78617 |
| C | -2.79682 | 1.38831  | 0.00755  |
| H | -1.85103 | 1.83156  | 0.33864  |
| H | -3.04976 | 1.82614  | -0.96573 |
| H | -3.57698 | 1.68797  | 0.72011  |
| C | -3.99123 | -0.75830 | -0.61320 |
| H | -4.83210 | -0.54479 | 0.06029  |
| H | -4.24699 | -0.35694 | -1.60123 |
| H | -3.90757 | -1.84794 | -0.70528 |
| C | -2.31073 | -0.74491 | 1.28050  |
| H | -2.19573 | -1.83371 | 1.21524  |
| H | -1.36629 | -0.32667 | 1.64738  |
| H | -3.08207 | -0.53551 | 2.03380  |
| O | 0.81321  | -1.57933 | -0.39298 |
| C | 1.80897  | -0.67739 | -0.03482 |
| O | 1.98106  | -1.25038 | -1.29039 |
| C | 2.75971  | -1.05203 | 1.06712  |
| C | 1.37189  | 0.79142  | -0.07637 |
| H | 2.99187  | -2.11528 | 0.98514  |
| H | 3.68026  | -0.46629 | 0.98513  |
| H | 2.30644  | -0.84783 | 2.04177  |
| F | 2.45506  | 1.58267  | -0.21763 |
| F | 0.77060  | 1.11971  | 1.09067  |
| F | 0.52531  | 1.04335  | -1.07431 |

### Intermediate:

|   |         |          |          |
|---|---------|----------|----------|
| C | 2.61902 | -0.08552 | 0.02311  |
| H | 0.64856 | 0.61079  | -0.44176 |
| C | 2.47994 | -1.28838 | -0.86413 |
| H | 1.71980 | -1.98338 | -0.49087 |

|   |          |          |          |
|---|----------|----------|----------|
| H | 2.21543  | -1.00813 | -1.89021 |
| H | 3.42942  | -1.85196 | -0.92129 |
| C | 3.30363  | 1.13007  | -0.52981 |
| H | 4.39884  | 0.98435  | -0.57566 |
| H | 2.97328  | 1.35441  | -1.55075 |
| H | 3.13109  | 2.01676  | 0.09169  |
| C | 2.62575  | -0.29755 | 1.50841  |
| H | 2.49112  | 0.64274  | 2.05741  |
| H | 1.84582  | -1.00086 | 1.82230  |
| H | 3.58839  | -0.72252 | 1.84815  |
| O | -0.10962 | 0.96713  | -0.95398 |
| C | -1.29507 | 0.84765  | -0.21163 |
| O | -2.33345 | 1.40379  | -0.84869 |
| C | -1.20060 | 1.59134  | 1.16132  |
| C | -1.59396 | -0.66684 | 0.03644  |
| H | -0.98444 | 2.64138  | 0.95890  |
| H | -2.13266 | 1.49688  | 1.71897  |
| H | -0.38006 | 1.14884  | 1.73397  |
| F | -2.68532 | -0.83952 | 0.79857  |
| F | -0.54701 | -1.24578 | 0.68533  |
| F | -1.77126 | -1.32373 | -1.11522 |

**Trifluoroacetone:**

|   |          |          |          |
|---|----------|----------|----------|
| C | -0.90093 | 0.30755  | -0.00000 |
| O | -1.24455 | 1.46509  | 0.00001  |
| C | 0.61181  | -0.03808 | -0.00001 |
| C | -1.82891 | -0.88078 | 0.00001  |
| H | -1.63958 | -1.50424 | -0.88137 |
| H | -1.63924 | -1.50453 | 0.88110  |
| H | -2.86409 | -0.53635 | 0.00025  |
| F | 1.37430  | 1.05367  | -0.00030 |
| F | 0.91321  | -0.77752 | -1.09114 |
| F | 0.91331  | -0.77701 | 1.09144  |

**2-eq-TS:**

|   |          |          |          |
|---|----------|----------|----------|
| O | -3.43913 | -0.08999 | -1.13131 |
| C | -2.61080 | -0.00187 | -0.03337 |
| O | -1.45313 | -0.08228 | -0.86420 |
| C | 2.93337  | -1.26070 | 0.22380  |
| C | 1.44286  | -1.28192 | -0.20001 |
| C | 0.76206  | -0.02158 | 0.28543  |
| C | 1.40492  | 1.26402  | -0.18474 |
| C | 2.89560  | 1.28048  | 0.23945  |
| C | 3.62997  | 0.02345  | -0.25050 |
| H | -0.43723 | -0.04206 | -0.24900 |
| H | 1.38301  | -1.32973 | -1.29541 |
| H | 0.94418  | -2.17508 | 0.19174  |
| H | 2.99873  | -1.33014 | 1.31881  |
| H | 3.43759  | -2.14757 | -0.17954 |
| H | 1.34368  | 1.32336  | -1.27950 |
| H | 0.88162  | 2.13806  | 0.21821  |
| H | 3.37378  | 2.18679  | -0.15230 |
| H | 2.95873  | 1.33802  | 1.33527  |
| H | 3.66862  | 0.03072  | -1.34933 |
| H | 0.52023  | -0.03197 | 1.35516  |
| C | -2.72050 | 1.34695  | 0.68213  |
| H | -3.70814 | 1.44954  | 1.14603  |
| H | -1.96603 | 1.44901  | 1.47183  |
| H | -2.59059 | 2.14943  | -0.04853 |
| C | -2.73880 | -1.20661 | 0.90236  |
| H | -1.98179 | -1.18418 | 1.69570  |
| H | -3.72553 | -1.21218 | 1.37922  |
| H | -2.62496 | -2.12414 | 0.31932  |
| H | 4.67009  | 0.03697  | 0.09902  |

**2-ax-TS:**

|   |          |          |          |
|---|----------|----------|----------|
| C | -0.83062 | -0.11719 | 1.13506  |
| C | -1.51411 | 1.21825  | 0.92441  |
| C | -2.15747 | 1.32293  | -0.46881 |
| C | -3.05707 | 0.11337  | -0.76764 |
| C | -2.28860 | -1.20983 | -0.62404 |
| C | -1.64285 | -1.34191 | 0.76592  |
| H | -2.29447 | 1.31604  | 1.69999  |
| H | -0.80918 | 2.04077  | 1.09442  |
| H | 0.15056  | -0.12019 | 0.27252  |
| H | -0.27701 | -0.20448 | 2.07634  |
| H | -3.91546 | 0.11567  | -0.07847 |
| H | -2.43200 | -1.45761 | 1.53007  |
| O | 0.93820  | -0.12757 | -0.63737 |
| C | 2.29467  | 0.00237  | -0.20260 |
| O | 2.73074  | -0.07466 | -1.50511 |
| H | -1.35680 | 1.37615  | -1.21752 |
| H | -2.73003 | 2.25535  | -0.54281 |
| H | -1.49685 | -1.25651 | -1.38258 |
| H | -1.02251 | -2.24380 | 0.82626  |
| H | -2.95501 | -2.06210 | -0.80376 |
| C | 2.57026  | 1.36377  | 0.43897  |
| H | 2.09156  | 1.45281  | 1.42178  |
| H | 3.64834  | 1.50503  | 0.57641  |
| H | 2.19480  | 2.15089  | -0.21998 |
| C | 2.74695  | -1.18550 | 0.64905  |
| H | 3.83372  | -1.15774 | 0.78720  |
| H | 2.28139  | -1.17333 | 1.64197  |
| H | 2.48170  | -2.11341 | 0.13594  |
| H | -3.47131 | 0.19674  | -1.77989 |

**3-eq-TS:**

|   |          |         |          |
|---|----------|---------|----------|
| O | -3.65785 | 0.04933 | -1.50062 |
| C | -3.06747 | 0.08350 | -0.26188 |

|   |          |          |          |
|---|----------|----------|----------|
| O | -1.80025 | -0.12675 | -0.88706 |
| C | 2.55868  | -1.22423 | -0.24271 |
| C | 1.02532  | -1.26523 | -0.43695 |
| C | 0.34118  | -0.18502 | 0.39115  |
| C | 0.89508  | 1.20427  | 0.10146  |
| C | 2.42888  | 1.23894  | 0.29529  |
| C | 3.14318  | 0.16661  | -0.54601 |
| H | -0.83455 | -0.14936 | -0.12696 |
| H | 0.79642  | -1.09845 | -1.49719 |
| H | 0.63274  | -2.25516 | -0.17748 |
| H | 2.81017  | -1.50519 | 0.79068  |
| H | 3.02288  | -1.97934 | -0.89012 |
| H | 0.66134  | 1.47000  | -0.93741 |
| H | 0.41372  | 1.95409  | 0.74053  |
| H | 2.80129  | 2.23734  | 0.03172  |
| H | 2.67237  | 1.08766  | 1.35718  |
| H | 2.94059  | 0.38769  | -1.60619 |
| C | -3.16685 | 1.45010  | 0.41791  |
| H | -4.20630 | 1.65688  | 0.69728  |
| H | -2.55887 | 1.49475  | 1.32998  |
| H | -2.83096 | 2.22136  | -0.27993 |
| C | -3.48170 | -1.08486 | 0.63377  |
| H | -2.89192 | -1.11684 | 1.55754  |
| H | -4.53771 | -0.98965 | 0.91144  |
| H | -3.34601 | -2.01971 | 0.08396  |
| C | 0.11846  | -0.51786 | 1.85540  |
| H | -0.48039 | 0.24999  | 2.35786  |
| H | -0.38022 | -1.48546 | 1.97575  |
| H | 1.07980  | -0.57740 | 2.38662  |
| C | 4.66168  | 0.20142  | -0.33526 |
| H | 5.16711  | -0.54245 | -0.96229 |
| H | 5.07483  | 1.18593  | -0.58443 |
| H | 4.91991  | -0.01326 | 0.70980  |

**3-ax-TS:**

|   |          |          |          |
|---|----------|----------|----------|
| C | -0.50501 | 1.06355  | 0.06205  |
| C | -1.30909 | 0.84481  | -1.21253 |
| C | -1.86047 | -0.58553 | -1.34251 |
| C | -2.62863 | -1.05150 | -0.08736 |
| C | -1.72956 | -0.89071 | 1.15715  |
| C | -1.18200 | 0.53743  | 1.32031  |
| H | -2.13804 | 1.57336  | -1.20485 |
| H | -0.69567 | 1.09620  | -2.08652 |
| H | 0.48648  | 0.24912  | -0.09422 |
| H | -2.00239 | 1.23377  | 1.56507  |
| O | 1.24665  | -0.69937 | -0.30514 |
| C | 2.63365  | -0.45711 | -0.03960 |
| O | 2.89937  | -1.75175 | -0.40331 |
| H | -1.01639 | -1.26309 | -1.51546 |
| H | -2.50756 | -0.64717 | -2.22689 |
| H | -0.87719 | -1.57457 | 1.07003  |
| H | -0.48633 | 0.58464  | 2.16757  |
| H | -2.28082 | -1.17612 | 2.06231  |
| C | 3.24326  | 0.57169  | -0.99236 |
| H | 2.90970  | 1.58997  | -0.76099 |
| H | 4.33634  | 0.55015  | -0.91544 |
| H | 2.95905  | 0.31978  | -2.01724 |
| C | 2.90679  | -0.17416 | 1.43807  |
| H | 3.98508  | -0.20107 | 1.63240  |
| H | 2.53631  | 0.81374  | 1.73743  |
| H | 2.42214  | -0.94320 | 2.04499  |
| H | -2.83070 | -2.12491 | -0.20765 |
| C | 0.12682  | 2.43488  | 0.19417  |
| H | 0.79218  | 2.49720  | 1.06240  |
| H | 0.69204  | 2.71044  | -0.70253 |
| H | -0.66064 | 3.19140  | 0.33165  |

|   |          |          |          |
|---|----------|----------|----------|
| C | -3.98834 | -0.35142 | 0.06903  |
| H | -4.61911 | -0.52221 | -0.81158 |
| H | -4.52694 | -0.73347 | 0.94451  |
| H | -3.89013 | 0.73341  | 0.19420  |

**4-eq-TS:**

|   |          |          |          |
|---|----------|----------|----------|
| O | -3.37647 | 0.30465  | -1.35326 |
| C | -2.74533 | -0.12933 | -0.21538 |
| O | -1.50434 | 0.31063  | -0.77312 |
| C | 2.58745  | -1.71584 | 0.12377  |
| C | 1.06760  | -1.47854 | -0.03721 |
| C | 0.69030  | -0.05864 | 0.36974  |
| C | 1.46027  | 0.99758  | -0.43278 |
| C | 2.98482  | 0.75954  | -0.26816 |
| C | 3.39214  | -0.66839 | -0.65680 |
| H | -0.49791 | 0.07837  | -0.09253 |
| H | 0.79539  | -1.63169 | -1.08954 |
| H | 0.50350  | -2.21174 | 0.55156  |
| H | 2.85736  | -1.67255 | 1.18810  |
| H | 2.83335  | -2.72817 | -0.21984 |
| H | 1.22140  | 0.81185  | -1.49021 |
| H | 3.52271  | 1.49145  | -0.88446 |
| H | 3.27472  | 0.95938  | 0.77369  |
| H | 3.22265  | -0.81137 | -1.73373 |
| C | -3.14447 | 0.65832  | 1.03310  |
| H | -4.18478 | 0.43792  | 1.29877  |
| H | -2.51535 | 0.40219  | 1.89376  |
| H | -3.05556 | 1.72751  | 0.82414  |
| C | -2.80184 | -1.64676 | -0.03177 |
| H | -2.16728 | -1.97968 | 0.79873  |
| H | -3.82956 | -1.96009 | 0.18451  |
| H | -2.47473 | -2.13140 | -0.95521 |
| H | 4.46678  | -0.81344 | -0.48774 |



|   |          |          |          |
|---|----------|----------|----------|
| C | 0.54848  | 0.17035  | 1.86479  |
| H | 0.08722  | 1.13579  | 2.09063  |
| H | -0.05576 | -0.61727 | 2.32820  |
| H | 1.53234  | 0.15513  | 2.35591  |
| C | 1.06329  | 2.44336  | -0.11519 |
| H | 1.55818  | 3.13268  | -0.80852 |
| H | -0.01824 | 2.57687  | -0.22065 |
| H | 1.35378  | 2.73606  | 0.90086  |

**4-ax-TS:**

|   |          |          |          |
|---|----------|----------|----------|
| C | -0.75824 | 0.68011  | 0.45079  |
| C | -1.63846 | 0.70337  | -0.80649 |
| C | -1.92097 | -0.72991 | -1.31282 |
| C | -2.45168 | -1.66217 | -0.21265 |
| C | -1.48521 | -1.71187 | 0.97891  |
| C | -1.19664 | -0.30549 | 1.52775  |
| H | -1.07580 | 1.23280  | -1.58779 |
| H | 0.32248  | 0.14514  | -0.00536 |
| H | -3.44171 | -1.32608 | 0.12765  |
| H | -2.10803 | 0.10136  | 1.99902  |
| O | 1.21355  | -0.51072 | -0.56069 |
| C | 2.56118  | -0.16000 | -0.22402 |
| O | 2.99327  | -1.15452 | -1.06251 |
| H | -0.98793 | -1.14551 | -1.71067 |
| H | -2.63113 | -0.68144 | -2.14832 |
| H | -0.53824 | -2.16323 | 0.65899  |
| H | -0.44070 | -0.34689 | 2.32220  |
| H | -1.89064 | -2.34277 | 1.77950  |
| C | 2.94478  | 1.23963  | -0.70421 |
| H | 2.47379  | 2.02215  | -0.09851 |
| H | 4.03095  | 1.37110  | -0.63919 |
| H | 2.63980  | 1.35431  | -1.74752 |
| C | 2.88591  | -0.42345 | 1.24685  |

|   |          |          |          |
|---|----------|----------|----------|
| H | 3.96632  | -0.34326 | 1.41292  |
| H | 2.39054  | 0.29739  | 1.90885  |
| H | 2.56570  | -1.43528 | 1.50815  |
| H | -2.59343 | -2.67000 | -0.62186 |
| C | -0.31074 | 2.03205  | 0.97394  |
| H | -1.14367 | 2.53749  | 1.48310  |
| H | 0.49603  | 1.93167  | 1.70872  |
| H | 0.03253  | 2.68814  | 0.16683  |
| C | -2.94342 | 1.50134  | -0.57540 |
| H | -2.74096 | 2.54386  | -0.30887 |
| H | -3.53888 | 1.50418  | -1.49544 |
| H | -3.56058 | 1.06515  | 0.21734  |

**5-TS:**

|   |          |          |          |
|---|----------|----------|----------|
| O | -3.28381 | -0.01891 | -1.44607 |
| C | -2.66995 | 0.04073  | -0.21991 |
| O | -1.41182 | -0.14661 | -0.86998 |
| C | 2.97514  | -1.18235 | -0.27623 |
| C | 1.43685  | -1.25157 | -0.42565 |
| C | 0.76144  | -0.12996 | 0.35457  |
| C | 1.28326  | 1.24813  | -0.03464 |
| C | 2.82188  | 1.32023  | 0.11395  |
| C | 3.51167  | 0.19934  | -0.67667 |
| H | -0.42735 | -0.13761 | -0.13116 |
| H | 1.17894  | -1.15069 | -1.48777 |
| H | 1.06220  | -2.22785 | -0.09691 |
| H | 3.43227  | -1.96694 | -0.89161 |
| H | 1.01850  | 1.44377  | -1.08155 |
| H | 0.80397  | 2.02765  | 0.56948  |
| H | 3.17031  | 2.30312  | -0.22648 |
| H | 3.33970  | 0.35632  | -1.75140 |
| C | -2.78676 | 1.41107  | 0.44948  |
| H | -3.82482 | 1.59689  | 0.74807  |

|   |          |          |          |
|---|----------|----------|----------|
| H | -2.16184 | 1.47772  | 1.34862  |
| H | -2.48269 | 2.18325  | -0.26183 |
| C | -3.03856 | -1.12833 | 0.69447  |
| H | -2.42920 | -1.13877 | 1.60608  |
| H | -4.09043 | -1.05447 | 0.99355  |
| H | -2.89325 | -2.06484 | 0.14999  |
| H | 4.59748  | 0.24246  | -0.52359 |
| C | 0.58364  | -0.37598 | 1.84188  |
| H | -0.01408 | 0.41215  | 2.31318  |
| H | 0.10433  | -1.34173 | 2.03481  |
| H | 1.55935  | -0.38912 | 2.34938  |
| H | 3.25527  | -1.39864 | 0.76418  |
| H | 3.09470  | 1.24363  | 1.17583  |

**6-TS:**

|   |          |          |          |
|---|----------|----------|----------|
| O | 3.61876  | -0.58868 | -1.19386 |
| C | 2.93499  | 0.06433  | -0.19973 |
| O | 1.75139  | -0.61160 | -0.62645 |
| C | -2.60776 | 0.83029  | -0.72746 |
| C | -1.05360 | 0.81950  | -0.63094 |
| C | -0.49716 | -0.18427 | 0.37535  |
| C | -1.05326 | -1.58889 | 0.17085  |
| C | -2.59842 | -1.57735 | 0.15828  |
| C | -3.13373 | -0.60955 | -0.90707 |
| H | 0.71044  | -0.31684 | -0.01627 |
| H | -0.66118 | 0.54891  | -1.61966 |
| H | -0.68502 | 1.82892  | -0.40989 |
| H | -2.84758 | 1.39024  | -1.64229 |
| H | -0.69672 | -1.97470 | -0.79310 |
| H | -0.67667 | -2.26715 | 0.94523  |
| H | -2.96332 | -2.59299 | -0.03805 |
| H | -2.82982 | -0.97727 | -1.89747 |
| C | 3.37547  | -0.34651 | 1.20551  |

|   |          |          |          |
|---|----------|----------|----------|
| H | 4.39363  | 0.01035  | 1.39867  |
| H | 2.71920  | 0.07422  | 1.97659  |
| H | 3.36644  | -1.43716 | 1.27635  |
| C | 2.85602  | 1.57739  | -0.40708 |
| H | 2.17236  | 2.04925  | 0.30932  |
| H | 3.84609  | 2.02790  | -0.27296 |
| H | 2.51248  | 1.78112  | -1.42446 |
| H | -4.23163 | -0.60704 | -0.89931 |
| C | -0.36805 | 0.26594  | 1.82051  |
| H | 0.25816  | -0.42662 | 2.39390  |
| H | 0.06318  | 1.27014  | 1.89577  |
| H | -1.35029 | 0.29458  | 2.31188  |
| C | -3.29478 | 1.57006  | 0.43148  |
| H | -2.88442 | 2.57945  | 0.55348  |
| H | -4.36906 | 1.66965  | 0.23512  |
| H | -3.18797 | 1.05274  | 1.39061  |
| H | -2.97778 | -1.30114 | 1.15096  |

**7-TS:**

|   |          |          |          |
|---|----------|----------|----------|
| O | 3.85524  | -0.22176 | -1.30994 |
| C | 3.19807  | 0.00365  | -0.12745 |
| O | 1.97688  | -0.25377 | -0.82068 |
| C | -2.28343 | 1.36405  | -0.53205 |
| C | -0.74111 | 1.23092  | -0.37962 |
| C | -0.28406 | -0.08732 | 0.23796  |
| C | -0.87828 | -1.30431 | -0.46517 |
| C | -2.42510 | -1.26002 | -0.62084 |
| C | -2.86283 | 0.10102  | -1.21025 |
| H | 0.92490  | -0.14980 | -0.14948 |
| H | -0.30016 | 1.29478  | -1.38275 |
| H | -0.34557 | 2.07985  | 0.19173  |
| H | -2.43870 | 2.19242  | -1.23805 |
| H | -0.44352 | -1.34863 | -1.47214 |

|   |          |          |          |
|---|----------|----------|----------|
| H | -0.57589 | -2.22635 | 0.04617  |
| H | -2.66641 | -2.01606 | -1.38162 |
| H | -2.54249 | 0.11908  | -2.26148 |
| C | 3.50153  | -1.04246 | 0.94496  |
| H | 4.53857  | -0.94132 | 1.28510  |
| H | 2.84832  | -0.92939 | 1.81837  |
| H | 3.36787  | -2.03962 | 0.51787  |
| C | 3.30431  | 1.44701  | 0.36511  |
| H | 2.63665  | 1.63543  | 1.21480  |
| H | 4.32927  | 1.65898  | 0.69043  |
| H | 3.04900  | 2.12383  | -0.45419 |
| H | -3.95948 | 0.16116  | -1.22508 |
| C | -0.16457 | -0.14601 | 1.75141  |
| H | 0.31694  | -1.07538 | 2.07463  |
| H | 0.41574  | 0.69968  | 2.13789  |
| H | -1.14961 | -0.10652 | 2.23335  |
| C | -2.99873 | 1.78473  | 0.76225  |
| H | -2.59645 | 2.73621  | 1.13085  |
| H | -4.07020 | 1.92830  | 0.57763  |
| H | -2.90484 | 1.05516  | 1.57081  |
| C | -3.18584 | -1.69141 | 0.64391  |
| H | -4.26700 | -1.68958 | 0.45979  |
| H | -2.90097 | -2.71065 | 0.93169  |
| H | -3.00279 | -1.04635 | 1.50727  |

**8-TS:**

|   |          |          |          |
|---|----------|----------|----------|
| O | -1.83101 | 2.78062  | -0.43005 |
| C | -0.49151 | 2.91192  | -0.71440 |
| O | -0.27488 | 2.02689  | 0.39001  |
| C | 3.50182  | -0.99209 | -0.07110 |
| C | 2.07014  | -0.32363 | -0.17630 |
| C | 1.85286  | 0.78585  | 0.86499  |
| C | 2.94424  | 1.85154  | 0.79383  |

|   |          |          |          |
|---|----------|----------|----------|
| C | 4.35073  | 1.23114  | 0.92859  |
| C | 4.56676  | 0.13078  | -0.11769 |
| H | 0.82408  | 1.39295  | 0.45474  |
| H | 2.07794  | 0.18505  | -1.15320 |
| H | 2.89123  | 2.36224  | -0.17812 |
| H | 2.78016  | 2.61268  | 1.56522  |
| H | 5.10409  | 2.01877  | 0.80461  |
| H | 4.55191  | 0.58888  | -1.11766 |
| C | -0.07848 | 2.33561  | -2.06584 |
| H | -0.52258 | 2.93635  | -2.86739 |
| H | 1.01044  | 2.35926  | -2.19579 |
| H | -0.42807 | 1.30531  | -2.15607 |
| C | 0.04923  | 4.31334  | -0.44614 |
| H | 1.14497  | 4.32809  | -0.47619 |
| H | -0.32079 | 5.01342  | -1.20371 |
| H | -0.28866 | 4.64622  | 0.53821  |
| H | 5.56376  | -0.31394 | 0.00335  |
| C | 1.41375  | 0.41169  | 2.27416  |
| H | 1.02492  | 1.29751  | 2.78652  |
| H | 0.63392  | -0.35408 | 2.28182  |
| H | 2.25748  | 0.03594  | 2.86642  |
| C | 3.70541  | -1.83890 | 1.20601  |
| H | 2.91512  | -2.57828 | 1.36073  |
| H | 4.65310  | -2.38598 | 1.12933  |
| H | 3.75852  | -1.23087 | 2.11187  |
| H | 4.48720  | 0.83432  | 1.94185  |
| C | 0.96199  | -1.39238 | -0.26098 |
| H | 0.88722  | -1.96950 | 0.66277  |
| C | 3.67031  | -1.90519 | -1.31282 |
| H | 3.66273  | -1.27648 | -2.21514 |
| H | 4.65935  | -2.38119 | -1.27340 |
| C | 1.17743  | -2.33215 | -1.45075 |
| C | 2.57298  | -2.97074 | -1.44036 |

|   |          |          |          |
|---|----------|----------|----------|
| H | 2.72102  | -3.54632 | -2.36198 |
| H | 2.64761  | -3.69207 | -0.61680 |
| H | 0.39408  | -3.09831 | -1.44224 |
| H | 1.04419  | -1.74744 | -2.37150 |
| O | -0.29613 | -0.71021 | -0.45332 |
| C | -1.33417 | -1.05148 | 0.36453  |
| O | -1.30818 | -1.97990 | 1.15699  |
| N | -2.38421 | -0.20921 | 0.15205  |
| H | -2.18687 | 0.69069  | -0.28221 |
| C | -3.57400 | -0.31503 | 0.95928  |
| H | -3.81318 | 0.64773  | 1.42276  |
| H | -3.41061 | -1.05779 | 1.74293  |
| C | -4.78251 | -0.74538 | 0.14280  |
| F | -4.60801 | -1.95573 | -0.42047 |
| F | -5.05029 | 0.13074  | -0.84912 |
| F | -5.87671 | -0.81137 | 0.93603  |

**9-TS:**

|   |          |          |          |
|---|----------|----------|----------|
| O | -1.51000 | 2.82885  | -0.25192 |
| C | -0.18850 | 2.89315  | -0.63295 |
| O | 0.08848  | 2.05615  | 0.49458  |
| C | 3.54029  | -1.27567 | -0.02674 |
| C | 2.18380  | -0.50385 | -0.15167 |
| C | 2.17480  | 0.70289  | 0.80068  |
| C | 3.34818  | 1.64232  | 0.54565  |
| C | 4.69010  | 0.89096  | 0.69047  |
| C | 4.73209  | -0.32714 | -0.23798 |
| H | 1.15090  | 1.37598  | 0.47540  |
| H | 2.14089  | -0.11227 | -1.17985 |
| H | 3.28557  | 2.04273  | -0.47604 |
| H | 3.30631  | 2.49610  | 1.23142  |
| H | 5.51651  | 1.57579  | 0.46443  |
| H | 4.73402  | 0.01422  | -1.28418 |

|   |          |          |          |
|---|----------|----------|----------|
| C | 0.10481  | 2.24005  | -1.98152 |
| H | -0.37750 | 2.81868  | -2.77714 |
| H | 1.18132  | 2.21881  | -2.19065 |
| H | -0.28365 | 1.21999  | -1.99609 |
| C | 0.41608  | 4.28564  | -0.47522 |
| H | 1.50639  | 4.25786  | -0.58601 |
| H | 0.01387  | 4.96290  | -1.23713 |
| H | 0.16388  | 4.67594  | 0.51369  |
| H | 5.66813  | -0.88184 | -0.09183 |
| C | 1.89079  | 0.42413  | 2.26948  |
| H | 1.88823  | 1.35733  | 2.84077  |
| H | 0.92195  | -0.06114 | 2.41397  |
| H | 2.65837  | -0.23235 | 2.70251  |
| H | 3.60038  | -1.67902 | 0.99651  |
| H | 4.82332  | 0.57231  | 1.73276  |
| C | 3.58052  | -2.46504 | -1.00232 |
| H | 4.52243  | -3.01171 | -0.86206 |
| H | 3.59346  | -2.07994 | -2.03298 |
| C | 0.99938  | -1.47096 | 0.01621  |
| H | 0.96031  | -1.86340 | 1.03698  |
| C | 2.38383  | -3.40735 | -0.82578 |
| C | 1.06031  | -2.64415 | -0.96257 |
| H | 2.42760  | -4.21898 | -1.56164 |
| H | 2.43409  | -3.88264 | 0.16434  |
| H | 0.95487  | -2.25382 | -1.98428 |
| H | 0.20436  | -3.29937 | -0.77209 |
| O | -0.19706 | -0.70066 | -0.21667 |
| C | -1.30676 | -1.03662 | 0.50259  |
| O | -1.39609 | -2.03661 | 1.19595  |
| N | -2.27462 | -0.09510 | 0.32078  |
| H | -2.00508 | 0.81442  | -0.05273 |
| C | -3.54777 | -0.21920 | 0.98225  |
| H | -3.48849 | -1.01621 | 1.72663  |



|   |          |          |          |
|---|----------|----------|----------|
| H | -3.81686 | 0.71725  | 1.48130  |
| C | -4.66920 | -0.56228 | 0.01289  |
| F | -4.45539 | -1.73574 | -0.61170 |
| F | -5.84400 | -0.65420 | 0.67757  |
| F | -4.81199 | 0.38493  | -0.93898 |

**10-eq-C2-TS:**

|   |          |          |          |
|---|----------|----------|----------|
| O | 5.43309  | -1.69296 | -1.18846 |
| C | 4.75295  | -1.22453 | -0.08431 |
| O | 3.70144  | -0.73211 | -0.91426 |
| C | 0.33925  | 2.47047  | -0.22787 |
| C | 1.67063  | 1.70171  | -0.53296 |
| C | 1.79026  | 0.40177  | 0.22314  |
| C | 0.64460  | -0.56053 | 0.01358  |
| C | -0.71534 | 0.10101  | 0.40523  |
| C | -0.84237 | 1.45647  | -0.39611 |
| H | 2.83232  | -0.19434 | -0.30050 |
| H | 1.69436  | 1.48306  | -1.60918 |
| H | 2.52482  | 2.35564  | -0.32217 |
| H | 0.60945  | -0.84710 | -1.04606 |
| H | 0.79559  | -1.47991 | 0.59155  |
| H | -0.75758 | 1.14308  | -1.44948 |
| H | 2.12144  | 0.50434  | 1.26118  |
| C | 4.28427  | -2.34857 | 0.84241  |
| H | 5.14571  | -2.83444 | 1.31440  |
| H | 3.63382  | -1.96904 | 1.64004  |
| H | 3.74042  | -3.09196 | 0.25397  |
| C | 5.49995  | -0.10083 | 0.63777  |
| H | 4.89086  | 0.34318  | 1.43456  |
| H | 6.41735  | -0.48970 | 1.09393  |
| H | 5.76770  | 0.67219  | -0.08698 |
| C | 0.41381  | 3.15495  | 1.15261  |
| H | 1.18760  | 3.93188  | 1.13953  |

|   |          |          |          |
|---|----------|----------|----------|
| H | -0.53332 | 3.64539  | 1.40379  |
| H | 0.65775  | 2.46719  | 1.96485  |
| C | -0.77390 | 0.22096  | 1.94650  |
| H | -1.47285 | 0.98427  | 2.29239  |
| H | -1.07808 | -0.73224 | 2.39305  |
| H | 0.20175  | 0.46546  | 2.37248  |
| C | 0.22798  | 3.58595  | -1.29208 |
| H | -0.58574 | 4.28416  | -1.06962 |
| H | 1.15528  | 4.17006  | -1.32428 |
| H | 0.05939  | 3.17341  | -2.29416 |
| C | -1.86456 | -0.76929 | -0.15828 |
| C | -2.25736 | 2.07417  | -0.27329 |
| H | -2.30985 | 2.98865  | -0.87175 |
| H | -2.45465 | 2.38163  | 0.76105  |
| C | -3.29579 | -0.19836 | 0.00256  |
| C | -3.37945 | 1.12307  | -0.75733 |
| H | -4.35983 | 1.59571  | -0.62289 |
| H | -3.26086 | 0.92319  | -1.82957 |
| O | -4.08309 | -1.25404 | -0.63989 |
| C | -3.47391 | -2.46655 | -0.44306 |
| O | -3.99302 | -3.50514 | -0.75458 |
| C | -3.88737 | -0.06560 | 1.41512  |
| H | -4.97403 | 0.01484  | 1.31115  |
| H | -3.67959 | -0.93856 | 2.04101  |
| H | -3.53336 | 0.82299  | 1.94071  |
| C | -2.08381 | -2.24623 | 0.17265  |
| H | -2.12202 | -2.46534 | 1.24662  |
| H | -1.36975 | -2.93648 | -0.28209 |
| H | -1.71049 | -0.75746 | -1.24770 |

**10-ax-C3-TS:**

|   |         |         |          |
|---|---------|---------|----------|
| C | 1.15968 | 1.84897 | -0.08842 |
| C | 2.04674 | 1.04209 | 0.86423  |

|   |          |          |          |
|---|----------|----------|----------|
| C | 1.40366  | 0.37236  | 2.05861  |
| C | 0.14946  | -0.42759 | 1.67566  |
| C | -0.87389 | 0.40932  | 0.86722  |
| C | -0.12768 | 1.00696  | -0.39118 |
| H | 2.99907  | 1.53808  | 1.08737  |
| H | 0.46768  | -1.28928 | 1.07553  |
| H | -0.32340 | -0.82483 | 2.58303  |
| H | 0.27253  | 0.11938  | -0.90285 |
| H | 1.15911  | 1.15105  | 2.79921  |
| C | 0.89263  | 3.23791  | 0.55240  |
| H | 1.83118  | 3.79862  | 0.63277  |
| H | 0.21538  | 3.82371  | -0.07927 |
| H | 0.45504  | 3.17895  | 1.55032  |
| C | -1.52831 | 1.44275  | 1.81560  |
| H | -1.93986 | 2.30972  | 1.29549  |
| H | -2.34461 | 0.97909  | 2.38049  |
| H | -0.81893 | 1.82170  | 2.55560  |
| C | 1.95199  | 2.09977  | -1.39448 |
| H | 1.43956  | 2.81513  | -2.04473 |
| H | 2.93628  | 2.52428  | -1.16144 |
| H | 2.11111  | 1.17003  | -1.94820 |
| C | -1.91671 | -0.55284 | 0.24596  |
| C | -1.10408 | 1.65433  | -1.40338 |
| H | -0.54622 | 2.01571  | -2.27264 |
| H | -1.58632 | 2.53855  | -0.96768 |
| C | -2.94276 | 0.07969  | -0.72551 |
| C | -2.18593 | 0.67055  | -1.91224 |
| H | -2.86808 | 1.18330  | -2.60115 |
| H | -1.71258 | -0.14534 | -2.47209 |
| O | -3.72724 | -1.09911 | -1.10294 |
| C | -3.77317 | -1.97515 | -0.05002 |
| O | -4.47033 | -2.95507 | -0.05816 |
| C | -3.97093 | 1.07775  | -0.16855 |

|   |          |          |          |
|---|----------|----------|----------|
| H | -4.78624 | 1.15390  | -0.89509 |
| H | -4.40438 | 0.74711  | 0.78015  |
| H | -3.55541 | 2.07622  | -0.02276 |
| C | -2.80269 | -1.50968 | 1.04570  |
| H | -3.36942 | -1.02941 | 1.85309  |
| H | -2.28801 | -2.37457 | 1.47015  |
| H | -1.32669 | -1.21403 | -0.40598 |
| H | 2.12995  | -0.28230 | 2.55480  |
| H | 2.46954  | 0.02712  | 0.14617  |
| O | 2.68080  | -0.95491 | -0.52118 |
| C | 4.01439  | -1.46693 | -0.40239 |
| O | 3.72284  | -2.45683 | -1.31170 |
| C | 4.30559  | -2.01218 | 0.99675  |
| H | 4.39884  | -1.20575 | 1.73425  |
| H | 3.49811  | -2.68630 | 1.29387  |
| H | 5.24689  | -2.57328 | 0.99277  |
| C | 5.06744  | -0.48026 | -0.90927 |
| H | 4.77921  | -0.12496 | -1.90171 |
| H | 5.17866  | 0.37666  | -0.23426 |
| H | 6.04095  | -0.97786 | -0.98342 |

**10-eq-C3-TS:**

|   |          |          |          |
|---|----------|----------|----------|
| C | 1.07586  | 1.08804  | -0.03004 |
| C | 1.77116  | -0.25076 | -0.28912 |
| C | 1.27088  | -1.46399 | 0.45740  |
| C | -0.23373 | -1.67223 | 0.15588  |
| C | -1.08406 | -0.41719 | 0.47277  |
| C | -0.45668 | 0.80758  | -0.30275 |
| H | 1.90828  | -0.44137 | -1.36093 |
| H | -0.34632 | -1.92819 | -0.90700 |
| H | -0.59953 | -2.53465 | 0.72829  |
| H | -0.47177 | 0.48437  | -1.35643 |
| H | 1.42914  | -1.34567 | 1.53480  |

|   |          |          |          |
|---|----------|----------|----------|
| C | 1.38499  | 1.63828  | 1.37981  |
| H | 2.44697  | 1.89161  | 1.44682  |
| H | 0.80895  | 2.54938  | 1.57461  |
| H | 1.16793  | 0.92873  | 2.17978  |
| C | -1.18225 | -0.26082 | 2.00982  |
| H | -1.37699 | 0.76458  | 2.32756  |
| H | -1.98750 | -0.88826 | 2.40705  |
| H | -0.26519 | -0.57908 | 2.51004  |
| C | 1.61708  | 2.10653  | -1.05884 |
| H | 1.25502  | 3.11973  | -0.85941 |
| H | 2.71010  | 2.13188  | -1.00462 |
| H | 1.33031  | 1.83820  | -2.08349 |
| C | -2.47902 | -0.57934 | -0.18179 |
| C | -1.35598 | 2.06691  | -0.25531 |
| H | -0.89557 | 2.86809  | -0.84072 |
| H | -1.42929 | 2.44884  | 0.77007  |
| C | -3.42436 | 0.64481  | -0.09179 |
| C | -2.77456 | 1.81557  | -0.82451 |
| H | -3.38201 | 2.72425  | -0.73645 |
| H | -2.70941 | 1.57183  | -1.89231 |
| O | -4.59919 | 0.13512  | -0.80532 |
| C | -4.70774 | -1.21636 | -0.60625 |
| O | -5.66138 | -1.84738 | -0.97823 |
| C | -3.95140 | 1.07402  | 1.28695  |
| H | -4.83107 | 1.70442  | 1.12282  |
| H | -4.26431 | 0.22276  | 1.89877  |
| H | -3.22311 | 1.65315  | 1.85743  |
| C | -3.44413 | -1.73270 | 0.09808  |
| H | -3.65839 | -1.89125 | 1.16198  |
| H | -3.15592 | -2.69600 | -0.32888 |
| H | -2.27204 | -0.65831 | -1.25999 |
| H | 1.82875  | -2.35761 | 0.15618  |
| H | 3.03350  | -0.07278 | 0.07525  |

|   |         |          |          |
|---|---------|----------|----------|
| O | 4.11882 | 0.24691  | 0.43117  |
| C | 5.17975 | -0.48193 | -0.19436 |
| C | 5.13261 | -1.97565 | 0.13484  |
| H | 5.01782 | -2.09994 | 1.21467  |
| H | 4.30541 | -2.47917 | -0.37999 |
| H | 6.06556 | -2.45806 | -0.17776 |
| C | 5.28880 | -0.18592 | -1.69166 |
| H | 4.45504 | -0.62343 | -2.25379 |
| H | 5.29962 | 0.89652  | -1.84307 |
| H | 6.21925 | -0.60510 | -2.09113 |
| O | 6.11968 | 0.19427  | 0.55179  |

**10-eq-C2-TS':**

|   |          |          |          |
|---|----------|----------|----------|
| O | 4.27250  | -0.91074 | -1.84214 |
| C | 3.80749  | -0.61193 | -0.59599 |
| O | 2.48649  | -0.54165 | -1.10985 |
| C | -0.90009 | 2.47336  | -0.08191 |
| C | 0.43329  | 1.74258  | -0.46214 |
| C | 0.57539  | 0.39742  | 0.20574  |
| C | -0.55944 | -0.56429 | -0.05812 |
| C | -1.92146 | 0.05574  | 0.39980  |
| C | -2.07322 | 1.46089  | -0.30109 |
| H | 1.60051  | -0.11753 | -0.34328 |
| H | 0.43977  | 1.59562  | -1.55033 |
| H | 1.28744  | 2.38264  | -0.21949 |
| H | -0.60897 | -0.77508 | -1.13465 |
| H | -0.39341 | -1.51972 | 0.45362  |
| H | -2.00306 | 1.22248  | -1.37494 |
| H | 0.90805  | 0.44268  | 1.24617  |
| C | 4.08117  | -1.74970 | 0.44404  |
| C | 4.22930  | 0.83104  | -0.18832 |
| C | -0.80815 | 3.06673  | 1.33923  |
| H | -0.04139 | 3.85006  | 1.36303  |

|   |          |          |          |
|---|----------|----------|----------|
| H | -1.75523 | 3.53093  | 1.63653  |
| H | -0.54352 | 2.33246  | 2.10286  |
| C | -1.95703 | 0.06488  | 1.94648  |
| H | -2.66302 | 0.78951  | 2.35571  |
| H | -2.23867 | -0.92271 | 2.32821  |
| H | -0.97938 | 0.29561  | 2.37507  |
| C | -1.03877 | 3.65601  | -1.06777 |
| H | -1.85370 | 4.33061  | -0.78469 |
| H | -0.11672 | 4.24876  | -1.07760 |
| H | -1.22283 | 3.30913  | -2.09168 |
| C | -3.06886 | -0.78729 | -0.20752 |
| C | -3.49252 | 2.05348  | -0.11406 |
| H | -3.56233 | 3.00699  | -0.64592 |
| H | -3.67689 | 2.28630  | 0.94200  |
| C | -4.50371 | -0.24471 | 0.01243  |
| C | -4.61144 | 1.12660  | -0.64884 |
| H | -5.59470 | 1.57655  | -0.46691 |
| H | -4.50687 | 1.00526  | -1.73414 |
| O | -5.28796 | -1.26051 | -0.69490 |
| C | -4.66488 | -2.47732 | -0.59091 |
| O | -5.17746 | -3.49714 | -0.96802 |
| C | -5.07852 | -0.22165 | 1.43794  |
| H | -6.16704 | -0.14414 | 1.35280  |
| H | -4.85586 | -1.13580 | 1.99638  |
| H | -4.72602 | 0.62932  | 2.02315  |
| C | -3.26853 | -2.28613 | 0.02116  |
| H | -3.28934 | -2.58225 | 1.07719  |
| H | -2.55452 | -2.93477 | -0.49137 |
| H | -2.93069 | -0.69707 | -1.29540 |
| C | 3.64279  | -1.39472 | 1.87795  |
| H | 3.81007  | -2.26195 | 2.52712  |
| H | 4.20694  | -0.55573 | 2.29446  |
| H | 2.57633  | -1.14861 | 1.93066  |

|   |         |          |          |
|---|---------|----------|----------|
| C | 5.59266 | -2.07536 | 0.43495  |
| H | 5.93527 | -2.30467 | -0.57960 |
| H | 6.19623 | -1.25221 | 0.82410  |
| H | 5.77966 | -2.95574 | 1.06040  |
| C | 3.30994 | -2.99991 | -0.02663 |
| H | 3.55424 | -3.24062 | -1.06443 |
| H | 3.58148 | -3.85410 | 0.60380  |
| H | 2.22724 | -2.85722 | 0.04017  |
| F | 3.47377 | 1.29977  | 0.84707  |
| F | 4.06053 | 1.68586  | -1.20524 |
| F | 5.51906 | 0.90449  | 0.20059  |

**10-ax-C3-TS':**

|   |          |          |          |
|---|----------|----------|----------|
| C | 0.14457  | -2.07096 | 0.36159  |
| C | -0.79119 | -1.22166 | 1.22858  |
| C | -0.16701 | -0.31481 | 2.26661  |
| C | 0.96874  | 0.54615  | 1.69534  |
| C | 2.04125  | -0.29013 | 0.95360  |
| C | 1.31077  | -1.15598 | -0.14776 |
| H | -1.66491 | -1.77628 | 1.58680  |
| H | 0.53129  | 1.27313  | 0.99876  |
| H | 1.43593  | 1.12152  | 2.50468  |
| H | 0.78639  | -0.40911 | -0.76219 |
| H | 0.20334  | -0.95235 | 3.08574  |
| C | 0.59709  | -3.28999 | 1.21367  |
| H | -0.26533 | -3.92776 | 1.43855  |
| H | 1.31440  | -3.89623 | 0.64921  |
| H | 1.06223  | -3.01131 | 2.16057  |
| C | 2.86365  | -1.08226 | 1.99905  |
| H | 3.32438  | -1.98605 | 1.59577  |
| H | 3.66598  | -0.45770 | 2.40666  |
| H | 2.25215  | -1.39074 | 2.85107  |
| C | -0.65573 | -2.63698 | -0.83564 |



|   |          |          |          |
|---|----------|----------|----------|
| H | -0.08880 | -3.41226 | -1.35985 |
| H | -1.58829 | -3.09375 | -0.48664 |
| H | -0.92154 | -1.85383 | -1.54976 |
| C | 2.92895  | 0.67105  | 0.12346  |
| C | 2.30606  | -1.84536 | -1.11298 |
| H | 1.75154  | -2.39809 | -1.87711 |
| H | 2.91065  | -2.59198 | -0.58239 |
| C | 3.97458  | 0.00998  | -0.80647 |
| C | 3.23785  | -0.84186 | -1.83690 |
| H | 3.94226  | -1.37963 | -2.48277 |
| H | 2.64419  | -0.18315 | -2.48236 |
| O | 4.59281  | 1.19331  | -1.41121 |
| C | 4.58318  | 2.22620  | -0.51130 |
| O | 5.15447  | 3.26436  | -0.71656 |
| C | 5.14116  | -0.76827 | -0.17693 |
| H | 5.91922  | -0.87241 | -0.93991 |
| H | 5.58419  | -0.24590 | 0.67648  |
| H | 4.85376  | -1.76916 | 0.14921  |
| C | 3.73029  | 1.83686  | 0.70554  |
| H | 4.38905  | 1.55997  | 1.53807  |
| H | 3.13646  | 2.69649  | 1.02419  |
| H | 2.23187  | 1.14909  | -0.58062 |
| H | -0.93423 | 0.32137  | 2.72281  |
| H | -1.37111 | -0.41718 | 0.41207  |
| O | -1.70654 | 0.42082  | -0.45460 |
| C | -3.08746 | 0.75611  | -0.58930 |
| O | -2.78882 | 1.47341  | -1.70460 |
| C | -3.70532 | 1.63082  | 0.55241  |
| C | -3.85655 | -0.54908 | -0.95464 |
| C | -4.15632 | 0.81230  | 1.77758  |
| H | -4.97223 | 0.12367  | 1.54115  |
| H | -3.33541 | 0.22919  | 2.20995  |
| H | -4.51523 | 1.49762  | 2.55397  |

|   |          |          |          |
|---|----------|----------|----------|
| C | -2.64200 | 2.66110  | 0.98335  |
| H | -3.09547 | 3.38952  | 1.66496  |
| H | -1.80289 | 2.19027  | 1.50328  |
| H | -2.24618 | 3.19677  | 0.11658  |
| C | -4.91521 | 2.40380  | -0.02429 |
| H | -4.62115 | 2.98179  | -0.90665 |
| H | -5.73656 | 1.74129  | -0.30475 |
| H | -5.29034 | 3.10648  | 0.72851  |
| F | -3.74775 | -1.48017 | 0.03430  |
| F | -5.17522 | -0.33762 | -1.15124 |
| F | -3.36736 | -1.10341 | -2.07148 |

**10-eq-C3-TS':**

|   |          |          |          |
|---|----------|----------|----------|
| C | 0.16665  | -1.13894 | 0.39718  |
| C | -0.59010 | 0.12305  | -0.02721 |
| C | -0.08836 | 1.45008  | 0.49087  |
| C | 1.38344  | 1.65320  | 0.05325  |
| C | 2.30093  | 0.48727  | 0.49255  |
| C | 1.66668  | -0.85834 | -0.03438 |
| H | -0.79522 | 0.13797  | -1.10360 |
| H | 1.41425  | 1.74877  | -1.04106 |
| H | 1.74942  | 2.60372  | 0.46294  |
| H | 1.59096  | -0.70640 | -1.12315 |
| H | -0.16823 | 1.49272  | 1.58226  |
| C | -0.01753 | -1.45418 | 1.89752  |
| H | -1.05314 | -1.75403 | 2.08159  |
| H | 0.63054  | -2.28339 | 2.20042  |
| H | 0.19749  | -0.60633 | 2.55010  |
| C | 2.52110  | 0.57432  | 2.02206  |
| H | 2.76480  | -0.38650 | 2.47813  |
| H | 3.33861  | 1.26601  | 2.25187  |
| H | 1.63836  | 0.95630  | 2.53950  |
| C | -0.38913 | -2.33489 | -0.40763 |

|   |          |          |          |
|---|----------|----------|----------|
| H | 0.04762  | -3.28102 | -0.07454 |
| H | -1.47048 | -2.41114 | -0.26899 |
| H | -0.19221 | -2.22734 | -1.48147 |
| C | 3.63512  | 0.58427  | -0.29112 |
| C | 2.61576  | -2.06966 | 0.13683  |
| H | 2.14632  | -2.96622 | -0.27698 |
| H | 2.78179  | -2.28119 | 1.19999  |
| C | 4.63330  | -0.58361 | -0.09371 |
| C | 3.97465  | -1.87268 | -0.57917 |
| H | 4.62184  | -2.73963 | -0.40056 |
| H | 3.81794  | -1.80387 | -1.66290 |
| O | 5.72603  | -0.15922 | -0.97323 |
| C | 5.79577  | 1.20954  | -0.99156 |
| O | 6.69093  | 1.80141  | -1.53372 |
| C | 5.28391  | -0.77660 | 1.28547  |
| H | 6.16782  | -1.40749 | 1.14845  |
| H | 5.61709  | 0.16743  | 1.72684  |
| H | 4.62342  | -1.27123 | 1.99974  |
| C | 4.57141  | 1.79367  | -0.27044 |
| H | 4.86116  | 2.11977  | 0.73588  |
| H | 4.21214  | 2.67115  | -0.81288 |
| H | 3.34305  | 0.48899  | -1.34786 |
| H | -0.69763 | 2.27119  | 0.09823  |
| H | -1.79448 | -0.01467 | 0.41573  |
| O | -2.85069 | -0.23507 | 1.01511  |
| C | -4.08405 | -0.01571 | 0.33718  |
| C | -4.46367 | 1.47744  | 0.05472  |
| C | -4.13123 | -0.98389 | -0.88209 |
| O | -4.76303 | -0.54084 | 1.39324  |
| F | -3.96158 | -2.25710 | -0.49318 |
| F | -5.30068 | -0.91832 | -1.55207 |
| F | -3.14271 | -0.70973 | -1.77801 |
| C | -3.81159 | 2.04842  | -1.21940 |

|   |          |         |          |
|---|----------|---------|----------|
| H | -4.16086 | 1.54809 | -2.12694 |
| H | -4.06703 | 3.11071 | -1.30722 |
| H | -2.71882 | 1.97503 | -1.19285 |
| C | -4.02234 | 2.30798 | 1.27697  |
| H | -4.39211 | 3.33430 | 1.17321  |
| H | -4.42642 | 1.88411 | 2.20010  |
| H | -2.93366 | 2.34657 | 1.37289  |
| C | -6.00215 | 1.57926 | -0.06811 |
| H | -6.29204 | 2.63328 | -0.14814 |
| H | -6.38430 | 1.05758 | -0.94830 |
| H | -6.49056 | 1.16275 | 0.81902  |

### Full Reference of 32

Frisch, M. J. T., G. W.; Schlegel, H. B.; Scuseria, G. E.; Robb, M. A.; Cheeseman, J. R.; Scalmani, G.; Barone, V.; Mennucci, B.; Petersson, G. A.; Nakatsuji, H.; Caricato, M.; Li, X.; Hratchian, H. P.; Izmaylov, A. F.; Bloino, J.; Zheng, G.; Sonnenberg, J. L.; Hada, M.; Ehara, M.; Toyota, K.; Fukuda, R.; Hasegawa, J.; Ishida, M.; Nakajima, T.; Honda, Y.; Kitao, O.; Nakai, H.; Vreven, T.; Montgomery, Jr., J. A.; Peralta, J. E.; Ogliaro, F.; Bearpark, M.; Heyd, J. J.; Brothers, E.; Kudin, K. N.; Staroverov, V. N.; Kobayashi, R.; Normand, J.; Raghavachari, K.; Rendell, A.; Burant, J. C.; Iyengar, S. S.; Tomasi, J.; Cossi, M.; Rega, N.; Millam, N. J.; Klene, M.; Knox, J. E.; Cross, J. B.; Bakken, V.; Adamo, C.; Jaramillo, J.; Gomperts, R.; Stratmann, R. E.; Yazyev, O.; Austin, A. J.; Cammi, R.; Pomelli, C.; Ochterski, J. W.; Martin, R. L.; Morokuma, K.; Zakrzewski, V. G.; Voth, G. A.; Salvador, P.; Dannenberg, J. J.; Dapprich, S.; Daniels, A. D.; Farkas, Ö.; Foresman, J. B.; Ortiz, J. V.; Cioslowski, J.; Fox, D. J.; B.01 ed.; Gaussian, Inc.: Wallingford CT, 2009.
